# Supplementary material
Source: HighWire-hosted journal article supplement (https://bmjopen.bmj.com/content/7/12/e017155)
Supplement: inline-supplementary-material-1 [file inline-supplementary-material-1.pdf]

**eTable1: Full data extraction table of included articles**

| <b>Author, Year</b>                  | <b>Study Design, Sample Size, Country</b>           | <b>Barriers to Incident Reporting</b>                                                                                                                                                                                                                                                      | <b>Facilitators of Incident Reporting</b> | <b>Negative cases (No impact)</b> |
|--------------------------------------|-----------------------------------------------------|--------------------------------------------------------------------------------------------------------------------------------------------------------------------------------------------------------------------------------------------------------------------------------------------|-------------------------------------------|-----------------------------------|
| Albolino et al., 2010 <sup>(1)</sup> | Questionnaire based-study<br>820<br>Italy           | <p>Fear of mistrust in colleagues</p> <p>Not considered a priority</p> <p>Fear of punishment</p> <p>Does not help to improve safety</p> <p>Lack of time</p>                                                                                                                                |                                           |                                   |
| Alsafi et al., 2011 <sup>(2)</sup>   | Questionnaire based-study.<br>107<br>Saudi Arabia   | <p>Not my responsibility</p> <p>I do not want to lose my good relationship with my colleague</p> <p>I might be reported by my colleague in turn</p> <p>No incentive to error disclose</p> <p>Avoiding punishment</p> <p>Avoiding damage to reputation</p> <p>It will not be discovered</p> |                                           |                                   |
| Anderson et al., 2013 <sup>(3)</sup> | Semi-structured interviews and documentary analysis | Experienced in using IR systems (Mental health staff)                                                                                                                                                                                                                                      |                                           |                                   |

|                              |                                                                            |                                                                                                                                                                                                                                                                                                                                                                                                                                                        |                                                                                                            |  |
|------------------------------|----------------------------------------------------------------------------|--------------------------------------------------------------------------------------------------------------------------------------------------------------------------------------------------------------------------------------------------------------------------------------------------------------------------------------------------------------------------------------------------------------------------------------------------------|------------------------------------------------------------------------------------------------------------|--|
|                              | 62<br>United Kingdom                                                       | Blame culture (mental health staff)                                                                                                                                                                                                                                                                                                                                                                                                                    |                                                                                                            |  |
| Arfanis et al., 2012<br>(4)  | Semi-structured interviews<br>48<br>United Kingdom                         | <p>Not used as learning tools to prevent similar occurrences elsewhere.</p> <p>Pressures on time</p> <p>Resources</p> <p>A lack of faith in the established system</p> <p>Fruitless and often pointless exercise that has little or no impact on improving patient safety and welfare</p> <p>Fear of litigation</p> <p>Fear of disciplinary action</p> <p>Blame</p> <p>The availability and ease of identifying the information</p> <p>No feedback</p> | <p>Feedback</p> <p>Learning and improvement</p> <p>Anonymous web based forum as an add on to IR system</p> |  |
| Armitage et al., 2010<br>(5) | Semi-structured interviews and retrospective review of error reports<br>40 | Lack of feedback                                                                                                                                                                                                                                                                                                                                                                                                                                       |                                                                                                            |  |

|                                          |                                                       |                                                                                                                                                                                                                                                                                                                                                                                                           |                                                                                                                                                                                                                                                                                                                                   |  |
|------------------------------------------|-------------------------------------------------------|-----------------------------------------------------------------------------------------------------------------------------------------------------------------------------------------------------------------------------------------------------------------------------------------------------------------------------------------------------------------------------------------------------------|-----------------------------------------------------------------------------------------------------------------------------------------------------------------------------------------------------------------------------------------------------------------------------------------------------------------------------------|--|
|                                          | United Kingdom                                        |                                                                                                                                                                                                                                                                                                                                                                                                           |                                                                                                                                                                                                                                                                                                                                   |  |
| Ashcroft et al.,<br>2006 <sup>(6)</sup>  | Questionnaire-based<br>Study<br>275<br>United Kingdom | <p>Local reporting</p> <p>Good patient outcome less likely to be reported than poor or bad patient outcome.</p> <p>Compliance with a protocol less likely to be reported than a violation or error.</p> <p>'Fault-led' attitude</p> <p>One-off situations by individuals not report</p> <p>Loyalty to colleagues</p> <p>National reporting system</p> <p>Confidence in National Patient Safety Agency</p> | <p>Local reporting</p> <p>Poor or bad patient outcome more likely to be reported than good patient outcome</p> <p>Violation of protocol or error more likely to be reported than compliance with protocol.</p> <p>'Learn from mistakes' culture</p> <p>Individuals making continual mistakes</p> <p>National reporting system</p> |  |
| Backstrom et al.,<br>2000 <sup>(7)</sup> | Questionnaire-based study.<br>748<br>Sweden           | <p>Assessment that the reaction is already well known</p> <p>Forgetting to report</p>                                                                                                                                                                                                                                                                                                                     |                                                                                                                                                                                                                                                                                                                                   |  |

|                                        |                                       |                                                                                                                                                                                                             |                       |                                                                                                                                                                                      |
|----------------------------------------|---------------------------------------|-------------------------------------------------------------------------------------------------------------------------------------------------------------------------------------------------------------|-----------------------|--------------------------------------------------------------------------------------------------------------------------------------------------------------------------------------|
|                                        |                                       | <p>Hesitance to report on suspicion</p> <p>Lack of time</p> <p>Giving preference to other matters</p> <p>Uncertainty about the existing rules for reporting</p> <p>Difficulty in finding the right form</p> |                       |                                                                                                                                                                                      |
| Ballangrud et al., 2012 <sup>(8)</sup> | Questionnaire-based study. 220 Norway | <p>Supervisor/manager expectations, actions promoting safety</p> <p>Feedback and communication about error</p>                                                                                              |                       | <p>Organisational learning and continuous improvement</p> <p>Teamwork within hospital units</p> <p>Communication openness</p> <p>Non punitive response to errors</p> <p>Staffing</p> |
| Bateman et al., 1992 <sup>(9)</sup>    | Questionnaire-based study. 1181       | One case cannot contribute to medical knowledge                                                                                                                                                             | Should be financially |                                                                                                                                                                                      |

|                                      |                                                   |                                                                                                                                                                                                                                                                                                          |                                                                                                                                                                                        |  |
|--------------------------------------|---------------------------------------------------|----------------------------------------------------------------------------------------------------------------------------------------------------------------------------------------------------------------------------------------------------------------------------------------------------------|----------------------------------------------------------------------------------------------------------------------------------------------------------------------------------------|--|
|                                      | United Kingdom                                    | <p>Impossible to determine responsible drug</p> <p>Serious ADRs well known when the drug is marketed</p> <p>Professional obligation</p> <p>Reporting increases personal liability</p> <p>Reporting results by badgering by Committee of safety of medicines</p> <p>Takes too much time to ADR report</p> | <p>reimbursed</p> <p>Would report if easier method</p>                                                                                                                                 |  |
| Bawazir et al., 2006 <sup>(10)</sup> | Questionnaire-based study.<br>172<br>Saudi Arabia | <p>No reporting forms available</p> <p>Reporting address unknown</p> <p>Reporting form too complicated</p> <p>Reporting ADRs is too time consuming</p> <p>All ADRs are known</p> <p>Want to publish myself</p> <p>Confidentiality</p> <p>Patient confidence</p>                                          | <p>An obligation to do so</p> <p>There was a fee</p> <p>Saw colleagues doing so</p> <p>Attention drawn by publication</p> <p>Receiving feedback</p> <p>Report through the internet</p> |  |

|                                         |                                                         |                                                                                                                                                                                                                                                                       |                                                                                                                                                                                                                            |  |
|-----------------------------------------|---------------------------------------------------------|-----------------------------------------------------------------------------------------------------------------------------------------------------------------------------------------------------------------------------------------------------------------------|----------------------------------------------------------------------------------------------------------------------------------------------------------------------------------------------------------------------------|--|
|                                         |                                                         | <p>Difficult to admit harm to patient</p> <p>Reporting could show ignorance</p> <p>Fear of liability</p> <p>No motivation</p> <p>Insufficient clinical knowledge</p> <p>Do not know how to report</p> <p>Causality uncertain</p> <p>One report make no difference</p> |                                                                                                                                                                                                                            |  |
| Beasley et al.,<br>2004 <sup>(11)</sup> | <p>Focus groups<br/>14<br/>United States of America</p> | Punitive system                                                                                                                                                                                                                                                       | <p>A feedback system for submitters is necessary to maintain interest.</p> <p>Safe and secure access</p> <p>There needs to be easy access</p> <p>What to report needs to be clearly defined</p> <p>The reporting forms</p> |  |

|                                     |                                                             |                                                                                                                                                                                                                                                                                                                                                                       |                                                                                                                                                                                                                          |  |
|-------------------------------------|-------------------------------------------------------------|-----------------------------------------------------------------------------------------------------------------------------------------------------------------------------------------------------------------------------------------------------------------------------------------------------------------------------------------------------------------------|--------------------------------------------------------------------------------------------------------------------------------------------------------------------------------------------------------------------------|--|
|                                     |                                                             |                                                                                                                                                                                                                                                                                                                                                                       | <p>must be simple</p> <p>Error reporting must fit into a clinicians current work flow</p> <p>A non-punitive system is essential</p> <p>Reporter should only be required to report once if there are multiple systems</p> |  |
| <p>Belton et al., 1995<br/>(12)</p> | <p>Questionnaire-based study<br/>284<br/>United Kingdom</p> | <p>Report forms are not available when needed</p> <p>Doctor does not like reporting confidential information</p> <p>Doctor unsure how to report an ADR</p> <p>Doctor fear he/she may appear foolish about reporting a suspected reaction</p> <p>Doctor fears he/she may be exposed to legal liability by reporting reaction</p> <p>Doctor too busy to send an ADR</p> |                                                                                                                                                                                                                          |  |

|                                     |                                                                                                                                                                              |                                                                                                                                                                                                                                                                                                                                                                           |  |                                                                                                                                                                                              |
|-------------------------------------|------------------------------------------------------------------------------------------------------------------------------------------------------------------------------|---------------------------------------------------------------------------------------------------------------------------------------------------------------------------------------------------------------------------------------------------------------------------------------------------------------------------------------------------------------------------|--|----------------------------------------------------------------------------------------------------------------------------------------------------------------------------------------------|
|                                     |                                                                                                                                                                              | <p>report</p> <p>Doctor is reluctant to admit he/she may have caused a patient harm</p> <p>Doctor would rather collect and publish personally</p> <p>Doctor believe that only safe drugs are marketed</p>                                                                                                                                                                 |  |                                                                                                                                                                                              |
| <p>Belton et al., 1997<br/>(13)</p> | <p>Questionnaire-based study</p> <p>Sample size not reported</p> <p>International: Denmark, France, Ireland, Italy, Netherlands, Portugal, Spain, Sweden, United Kingdom</p> | <p>Telephone number unavailable</p> <p>Report forms unavailable</p> <p>Address of reporting agency unavailable</p> <p>Unsure how to report</p> <p>Patient confidentiality</p> <p>Worried about appearing foolish</p> <p>Worried about legal liability (Not Denmark or Spain)</p> <p>Too busy to report ADRs</p> <p>Reluctant to admit they have caused a patient harm</p> |  | <p>Worried about legal liability (Not Denmark or Spain)</p> <p>Ambition to publish a personal series of cases (Not Spain, Sweden or Portugal)</p> <p>Patient confidentiality (Not Spain)</p> |



|                                                |                                                                        |                                                                                                                                                                                   |  |                                  |
|------------------------------------------------|------------------------------------------------------------------------|-----------------------------------------------------------------------------------------------------------------------------------------------------------------------------------|--|----------------------------------|
|                                                |                                                                        | <p>Ambition to publish a personal series of cases (Not Spain, Sweden or Portugal)</p> <p>Believes that all marketed drugs are safe</p>                                            |  |                                  |
| <p>Blegen et al., 2004<sup>(14)</sup></p>      | <p>Questionnaire-based study<br/>1105<br/>United States of America</p> | <p>Administrative response</p> <p>Personal fear</p> <p>Quality management</p> <p>Staffing resources</p> <p>Physical resources</p> <p>Peer relations</p> <p>Job satisfaction</p>   |  |                                  |
| <p>Braithwaite et al., 2010<sup>(15)</sup></p> | <p>Questionnaire-based study.<br/>2185<br/>Australia</p>               | <p>IIMS training</p> <p>Accessibility of reporting system</p> <p>Security of IIMS</p> <p>Feedback from reports</p> <p>Workplace reporting culture</p> <p>Value placed on IIMS</p> |  | <p>Form of training received</p> |

|                                       |                                             |                                                                                                                                                                                                                                                                                                                                                                                                                                                                                                     |                  |     |
|---------------------------------------|---------------------------------------------|-----------------------------------------------------------------------------------------------------------------------------------------------------------------------------------------------------------------------------------------------------------------------------------------------------------------------------------------------------------------------------------------------------------------------------------------------------------------------------------------------------|------------------|-----|
|                                       |                                             |                                                                                                                                                                                                                                                                                                                                                                                                                                                                                                     |                  |     |
| Chang et al.,<br>2012 <sup>(16)</sup> | Questionnaire-based study<br>183<br>Taiwan  |                                                                                                                                                                                                                                                                                                                                                                                                                                                                                                     | Level of support | Age |
| Chiang et al., 2006<br>(17)           | Questionnaire-based study.<br>597<br>Taiwan | <p>Being blamed for MAE results</p> <p>Adverse consequences from reporting</p> <p>Patient's negative attitude</p> <p>Physicians' reprimand</p> <p>Not recognised MAEs occurred</p> <p>Being recognised as incompetent</p> <p>Too much time for filling reports</p> <p>Think MAEs not important enough to be reported</p> <p>Too much time for contacting physicians</p> <p>Unclear MAE definition</p> <p>Disagreement over MAE</p> <p>Unrealistic expectation for administering drugs correctly</p> |                  |     |

|                                     |                                             |                                                                                                                                                                                                                                    |                                                                                                                    |                                                                                                     |
|-------------------------------------|---------------------------------------------|------------------------------------------------------------------------------------------------------------------------------------------------------------------------------------------------------------------------------------|--------------------------------------------------------------------------------------------------------------------|-----------------------------------------------------------------------------------------------------|
|                                     |                                             | <p>No positive feedback</p> <p>Much emphasis on MAE as nursing quality provided</p> <p>Focus on individual rather than system factors to MAEs</p> <p>Administrators' responses to MAEs do not match the severity of the errors</p> |                                                                                                                    |                                                                                                     |
| Chiang et al., 2010 <sup>(18)</sup> | Questionnaire-based study<br>838<br>Taiwan  | <p>Experience of making MAEs</p> <p>Nursing professional development</p> <p>Fear</p>                                                                                                                                               | <p>Same attitude towards self and co-workers</p> <p>MAE reporting rate</p> <p>Nursing quality</p>                  | <p>Age</p> <p>Management and leadership</p> <p>Administrative barriers</p> <p>Reporting process</p> |
| Chiang et al., 2012 <sup>(19)</sup> | Questionnaire-based study<br>1049<br>Taiwan |                                                                                                                                                                                                                                    | <p>High scores on the safety organising scale</p> <p>Tenure of present position</p> <p>Self-evaluated IR rates</p> |                                                                                                     |

|                             |                                                                              |                                                                                                                                                                                    |                                                                                                 |  |
|-----------------------------|------------------------------------------------------------------------------|------------------------------------------------------------------------------------------------------------------------------------------------------------------------------------|-------------------------------------------------------------------------------------------------|--|
|                             |                                                                              |                                                                                                                                                                                    | Those more willing to report their own incidents are more likely to report co-workers incidents |  |
| Church et al., 2013<br>(20) | Questionnaire-based study<br>546<br>United States of America                 | Hierarchical structure<br><br>Poor communication<br><br>Fear of reprimand<br><br>Reprimand of other therapists and dosimetrists<br><br>Personality<br><br>Lack of reporting system |                                                                                                 |  |
| Clark et al., 2013<br>(21)  | Questionnaire-based study<br>228<br>International: Australia and New Zealand | Fear of being judged by colleagues<br><br>Personal Guilt<br><br>Feel it as unnecessary<br><br>Near misses are part of life                                                         |                                                                                                 |  |
| Coley et al., 2006<br>(22)  | Focus groups<br>8<br>United States of America                                | Time consuming<br><br>Inadequate staffing                                                                                                                                          |                                                                                                 |  |

|                                        |                                                                          |                                                                                                                                                                                                                                                                                                                                                                                                                                                                                  |                        |                              |
|----------------------------------------|--------------------------------------------------------------------------|----------------------------------------------------------------------------------------------------------------------------------------------------------------------------------------------------------------------------------------------------------------------------------------------------------------------------------------------------------------------------------------------------------------------------------------------------------------------------------|------------------------|------------------------------|
| Cosentino et al., 1997 <sup>(23)</sup> | Questionnaire-based study<br>207<br>Italy                                | <p>Reaction not clinically relevant</p> <p>Awareness of similar reactions</p> <p>Unavailability of report forms</p> <p>Doubtfulness about which ADRs should be reported</p> <p>Confidence about ADRs being well documented before marketing</p> <p>Ignorance about reporting procedures</p> <p>Too much time required to fill in the report form</p> <p>Don't feel obliged to report</p> <p>Don't want to create undue alarm</p> <p>Uselessness of ADR spontaneous reporting</p> |                        |                              |
| Covell et al., 2009 <sup>(24)</sup>    | Semi-structured interviews and questionnaire based study<br>50<br>Canada | Adverse consequences                                                                                                                                                                                                                                                                                                                                                                                                                                                             |                        |                              |
| Daly et al., 2005 <sup>(25)</sup>      | Questionnaire-based study<br>598                                         | Administrators' length of time in position                                                                                                                                                                                                                                                                                                                                                                                                                                       | Directors of nursings' | Administrators' knowledge of |

|                     |                          |                                                                                                                                                                                                                                                                                                                                                                                                                     |                                                                                     |                                                                                                                                                                                                                                                                                                                                                                            |
|---------------------|--------------------------|---------------------------------------------------------------------------------------------------------------------------------------------------------------------------------------------------------------------------------------------------------------------------------------------------------------------------------------------------------------------------------------------------------------------|-------------------------------------------------------------------------------------|----------------------------------------------------------------------------------------------------------------------------------------------------------------------------------------------------------------------------------------------------------------------------------------------------------------------------------------------------------------------------|
|                     | United States of America | <p>Administrators' and Directors' length of time in facility</p> <p>Administrators' length of time in profession</p> <p>After internal investigation abuse was thought not to exist</p> <p>Told not to report the abuse by my boss</p> <p>Reported abuse in the past and IDIA did nothing</p> <p>Reported abuse in the past and it led to a bad outcome</p> <p>Reported abuse in the past and IDIA ruled it out</p> | <p>knowledge of the law in of nursing</p> <p>Administrators' level of education</p> | <p>law</p> <p>Administrators' belief that 'elders are able to get help if they need it'</p> <p>Age of administrators and directors of nursing</p> <p>Director of nursings' length of time in position</p> <p>Director of nursings' length of time in profession</p> <p>Director of nursings' level of education</p> <p>Administrators' knowledge of the law in nursing</p> |
| Davies et al., 2012 | Focus groups             | Lack of feedback                                                                                                                                                                                                                                                                                                                                                                                                    |                                                                                     |                                                                                                                                                                                                                                                                                                                                                                            |

|                                         |                                                             |                                                                                                                                                                                                                                                                                            |               |  |
|-----------------------------------------|-------------------------------------------------------------|--------------------------------------------------------------------------------------------------------------------------------------------------------------------------------------------------------------------------------------------------------------------------------------------|---------------|--|
| (26)                                    | 19<br>International: United Kingdom/Uganda                  |                                                                                                                                                                                                                                                                                            |               |  |
| Ehrenpreis et al., 2012 <sup>(27)</sup> | Questionnaire-based study<br>92<br>United States of America | <p>Unsure how to report appropriately</p> <p>Did not see adverse events on a regular basis</p> <p>Too busy to make reports</p> <p>The existing method was too cumbersome</p> <p>Voluntary reporting was not an important process</p>                                                       | Easier to use |  |
| Eland et al., 1999 <sup>(28)</sup>      | Questionnaire-based study<br>1357<br>Netherlands            | <p>Uncertain association</p> <p>Too trivial to report</p> <p>Too well known to report</p> <p>Unaware of the existence of a nation ADR reporting system</p> <p>Unaware of the need to report ADRs</p> <p>Did not know how to report ADRs</p> <p>Too bureaucratic</p> <p>Not enough time</p> |               |  |

|                                    |                                                          |                                                                                                                                                                                                                                                                                      |                                                                                                                                                                                                                                                        |  |
|------------------------------------|----------------------------------------------------------|--------------------------------------------------------------------------------------------------------------------------------------------------------------------------------------------------------------------------------------------------------------------------------------|--------------------------------------------------------------------------------------------------------------------------------------------------------------------------------------------------------------------------------------------------------|--|
|                                    |                                                          | <p>Concerned that the report could be used in legal case for damages by the patient</p> <p>If another physician had prescribed the medicine</p> <p>Medication brought over counter rather than prescribed</p>                                                                        |                                                                                                                                                                                                                                                        |  |
| Elder et al., 2007 <sup>(29)</sup> | <p>Focus groups<br/>139<br/>United States of America</p> | <p>Burden of effort</p> <p>Lack of time</p> <p>Forgetfulness</p> <p>Information not readily available</p> <p>Computer problems</p> <p>Online access</p> <p>What to report</p> <p>Who should report</p> <p>What is an AE</p> <p>What information is needed</p> <p>Common problems</p> | <p>Perceived benefit of reporting – learning and improvement</p> <p>Emotional benefit</p> <p>Guilt</p> <p>Personal responsibility</p> <p>Anonymous reporting</p> <p>Easing the burden of reporting</p> <p>The more harm, the more likely to report</p> |  |



|                                    |                                                                                        |                                                                                                                                                                                                                                                                                                                                                                                                    |                                                                                                                                                                                                                                                                                             |  |
|------------------------------------|----------------------------------------------------------------------------------------|----------------------------------------------------------------------------------------------------------------------------------------------------------------------------------------------------------------------------------------------------------------------------------------------------------------------------------------------------------------------------------------------------|---------------------------------------------------------------------------------------------------------------------------------------------------------------------------------------------------------------------------------------------------------------------------------------------|--|
|                                    |                                                                                        | <p>Rare errors</p> <p>Less serious errors unlikely to be reported</p> <p>Feeling personally responsible</p>                                                                                                                                                                                                                                                                                        |                                                                                                                                                                                                                                                                                             |  |
| <p>Elder et al., 2008<br/>(30)</p> | <p>Focus groups and questionnaire-based study<br/>125<br/>United States of America</p> | <p>Too busy with other activities</p> <p>Didn't reach the patient</p> <p>Risk of harm is none or little</p> <p>Error made my someone new-give them a break</p> <p>Feel worse emotionally</p> <p>Feel like a failure</p> <p>Fear punishment</p> <p>Blame</p> <p>Name on permanent record</p> <p>Risk losing friends</p> <p>Will make enemies on unit</p> <p>No feedback so no personal benefits</p> | <p>Asked by management to make specific reports</p> <p>Harm actually occurred</p> <p>Risk of harm is great</p> <p>Error made by someone unable to be spoken to one-to-one</p> <p>Feel better emotionally</p> <p>Outlet for irritation at situation or person</p> <p>Honesty is a virtue</p> |  |

|                            |                                                             |                              |                                                                                                                                                                                           |  |
|----------------------------|-------------------------------------------------------------|------------------------------|-------------------------------------------------------------------------------------------------------------------------------------------------------------------------------------------|--|
|                            |                                                             |                              | <p>Get a “there but for the grace of god” understanding</p> <p>Improve clinical practice</p> <p>Could be a learning experience for others</p> <p>No known penalty for making a report</p> |  |
| Erler et al., 2013<br>(31) | Questionnaire-based study<br>51<br>United States of America |                              | <p>Higher levels of teamwork</p> <p>Communication openness</p> <p>Perception of manager actions promoting safety</p>                                                                      |  |
| Espin et al., 2010<br>(32) | Semi-structured interviews<br>37<br>Canada                  | Did not feel it was an error | <p>Patient negligence</p> <p>Threat of potential or actual harm to the patient</p> <p>Patient advocacy</p>                                                                                |  |

|                                     |                                                           |                                                                                                                                                                                                                                |                                                                                                               |  |
|-------------------------------------|-----------------------------------------------------------|--------------------------------------------------------------------------------------------------------------------------------------------------------------------------------------------------------------------------------|---------------------------------------------------------------------------------------------------------------|--|
|                                     |                                                           |                                                                                                                                                                                                                                | <p>Following proper procedure</p> <p>Error prevention</p> <p>Learning opportunities</p>                       |  |
| Espin, et al., 2007 <sup>(33)</sup> | Semi-structured interviews<br>13<br>Canada                | <p>Domain-specific expertise is a necessary pre-requisite for reporting the error</p> <p>Part of the surgeon's responsibility as it fell within the surgical scope of practice.</p>                                            | <p>Events outside of professional boundaries were more likely to be reported</p> <p>Responsible for error</p> |  |
| Espin et al., 2006 <sup>(34)</sup>  | Semi-structured and structured interviews<br>28<br>Canada | Responsibility                                                                                                                                                                                                                 |                                                                                                               |  |
| Evans et al., 2006 <sup>(35)</sup>  | Questionnaire-based study<br>773<br>Australia             | <p>I never get any feedback on what action is taken</p> <p>I don't feel confident it is kept anonymous</p> <p>The incident form takes too long to fill out and I just don't have time</p> <p>I am worried about litigation</p> |                                                                                                               |  |

|  |  |                                                                                                                                                                                                                                                                                                                                                                                                                                                                                                                                                                                                                                                                                                                                   |  |  |
|--|--|-----------------------------------------------------------------------------------------------------------------------------------------------------------------------------------------------------------------------------------------------------------------------------------------------------------------------------------------------------------------------------------------------------------------------------------------------------------------------------------------------------------------------------------------------------------------------------------------------------------------------------------------------------------------------------------------------------------------------------------|--|--|
|  |  | <p>The incident was too trivial</p> <p>When the ward is busy I forget to make a report</p> <p>It's not my responsibility to report someone else's mistakes</p> <p>I don't know whose responsibility it is to make a report</p> <p>I don't want to get into trouble</p> <p>When it is a near miss, I don't see any point in reporting it</p> <p>Even if I don't give my details, I am sure that they'll track me down</p> <p>The AIMS+ form is too complicated and requires too much detail</p> <p>Junior staff are often blamed unfairly for adverse incidents</p> <p>I wonder about who else is privy to the information that I disclose</p> <p>If I discuss the case with the person involved nothing else needs to be done</p> |  |  |
|--|--|-----------------------------------------------------------------------------------------------------------------------------------------------------------------------------------------------------------------------------------------------------------------------------------------------------------------------------------------------------------------------------------------------------------------------------------------------------------------------------------------------------------------------------------------------------------------------------------------------------------------------------------------------------------------------------------------------------------------------------------|--|--|

|                                        |                                                                                                                       |                                                                                                                                                                                                                   |                                                                                                                                                                                  |                                                                                                                                                     |
|----------------------------------------|-----------------------------------------------------------------------------------------------------------------------|-------------------------------------------------------------------------------------------------------------------------------------------------------------------------------------------------------------------|----------------------------------------------------------------------------------------------------------------------------------------------------------------------------------|-----------------------------------------------------------------------------------------------------------------------------------------------------|
|                                        |                                                                                                                       | <p>I don't want the case discussed in meetings</p> <p>I am worried about disciplinary action</p> <p>Adverse incident reporting is unlikely to lead to system changes</p> <p>My co-workers may be unsupportive</p> |                                                                                                                                                                                  |                                                                                                                                                     |
| Fairbanks et al., 2008 <sup>(36)</sup> | <p>Interviews, focus groups and events reports from an anonymous system</p> <p>15</p> <p>United States of America</p> | <p>Blame and Shame</p> <p>Punishment</p> <p>Legal factors</p> <p>Reluctance to tell on colleagues</p>                                                                                                             | Non punitive system                                                                                                                                                              |                                                                                                                                                     |
| Fukuda et al., 2010 <sup>(37)</sup>    | <p>Questionnaire-based study</p> <p>Sample size not stated</p> <p>Japan</p>                                           |                                                                                                                                                                                                                   | <p>Decreased time for reporting (nurses and physicians)</p> <p>Electronic reporting (physicians)</p> <p>Attendance at educational seminars (physicians)</p> <p>Hospital size</p> | <p>Non-punitive policy (physicians/nurses)</p> <p>Rate of recommendations derived from reported incidents (physicians/nurses)</p> <p>Electronic</p> |

|  |  |  |                                                   |                                                                    |
|--|--|--|---------------------------------------------------|--------------------------------------------------------------------|
|  |  |  | Ownership – university hospital (physicians)      | reporting (nurses)                                                 |
|  |  |  | Ownership – national hospital (nurses)            | Attendance at educational seminars (nurses)                        |
|  |  |  | Assignment of patient safety manager (physicians) | Elapsed years of incident reporting system (physicians and nurses) |
|  |  |  |                                                   | Attendance at conference (Physicians/nurses)                       |
|  |  |  |                                                   | Ward rounds (Physicians/nurses)                                    |
|  |  |  |                                                   | Ownership – university hospital (nurses)                           |
|  |  |  |                                                   | Ownership – national                                               |

|                           |                                                                                                                                                                                      |                  |                     |                                                                                                                                                                                       |
|---------------------------|--------------------------------------------------------------------------------------------------------------------------------------------------------------------------------------|------------------|---------------------|---------------------------------------------------------------------------------------------------------------------------------------------------------------------------------------|
|                           |                                                                                                                                                                                      |                  |                     | <p>hospital (physicians)</p> <p>Ownership – municipal + public hospitals + healthcare corporation + other (physicians/nurse)</p> <p>Assignment of patient safety manager (nurses)</p> |
| Gaal et al., 2010<br>(38) | <p>Observational study</p> <p>Sample size not stated</p> <p>International: Austria, Belgium, England, France, Germany, Israel, The Netherlands, Slovenia, Switzerland, and Wales</p> |                  | Group (>3) practice | <p>Practice setting</p> <p>Amount of responsibility</p> <p>Hours of work</p> <p>Physical working conditions</p> <p>Single+ dual practice</p>                                          |
| Garbutt et al., 2007      | Questionnaire-based study                                                                                                                                                            | Private practice | Belief that errors  | Perceived risk                                                                                                                                                                        |

|      |                                 |  |                                                                                                                                                                                                                                                                                                                                                                                                                                                     |                                                                              |
|------|---------------------------------|--|-----------------------------------------------------------------------------------------------------------------------------------------------------------------------------------------------------------------------------------------------------------------------------------------------------------------------------------------------------------------------------------------------------------------------------------------------------|------------------------------------------------------------------------------|
| (39) | 557<br>United States of America |  | <p>are one of the most serious issues in healthcare</p> <p>Belief that they should report serious errors</p> <p>Belief that they should report minor errors</p> <p>Belief that they should report near misses</p> <p>System change to improve patient safety after errors reported</p> <p>If error was caused by system rather than individual failures</p> <p>Personal involvement in serious errors</p> <p>Assurance that the information was</p> | <p>for personal malpractice risk</p> <p>Personal involvement in an error</p> |
|------|---------------------------------|--|-----------------------------------------------------------------------------------------------------------------------------------------------------------------------------------------------------------------------------------------------------------------------------------------------------------------------------------------------------------------------------------------------------------------------------------------------------|------------------------------------------------------------------------------|



|                                       |                                                                                |                                                                                                                                                                                                                                                                    |                                                                                                                                                                      |                                                             |
|---------------------------------------|--------------------------------------------------------------------------------|--------------------------------------------------------------------------------------------------------------------------------------------------------------------------------------------------------------------------------------------------------------------|----------------------------------------------------------------------------------------------------------------------------------------------------------------------|-------------------------------------------------------------|
|                                       |                                                                                |                                                                                                                                                                                                                                                                    | <p>confidential</p> <p>A non-punitive reporting system</p> <p>A process that takes less than 2 minutes to use</p> <p>Local to the clinician's unit or department</p> |                                                             |
| Generali et al., 1995 <sup>(40)</sup> | <p>Questionnaire-based study 235</p> <p>United States of America</p>           | <p>Unsure drug caused reaction</p> <p>Do not have forms</p> <p>Do not know how</p> <p>Reaction was expected</p> <p>Reporting would not occur to me</p> <p>Fear of legal liability</p> <p>Not my responsibility</p> <p>Hours worked per week (&gt;49 or &lt;40)</p> | <p>Hours worked per week (43-49 hours)</p> <p>Work setting</p>                                                                                                       | <p>Age</p> <p>Gender</p> <p>Number of years in practice</p> |
| Gladstone, 1995 <sup>(41)</sup>       | <p>Questionnaires and semi-structured interviews 107</p> <p>United Kingdom</p> | <p>Fear of management reaction</p>                                                                                                                                                                                                                                 |                                                                                                                                                                      |                                                             |

|                            |                                                    |                                                                                                                                                                                                                                                                                                                                                          |                                                                                                                                                                                       |  |
|----------------------------|----------------------------------------------------|----------------------------------------------------------------------------------------------------------------------------------------------------------------------------------------------------------------------------------------------------------------------------------------------------------------------------------------------------------|---------------------------------------------------------------------------------------------------------------------------------------------------------------------------------------|--|
|                            |                                                    |                                                                                                                                                                                                                                                                                                                                                          |                                                                                                                                                                                       |  |
| Green et al., 1999<br>(42) | Structured interview<br>30<br>United Kingdom       | <p>Lack of time/too busy</p> <p>Well recognised reaction</p> <p>Limited time to spend with patients</p> <p>Lack of motivation</p> <p>More information about ADR needed</p> <p>Lack of confidence in making report</p> <p>Patient confidentiality</p> <p>Patient suffered an ADR to a product counter prescribed by the pharmacists being interviewed</p> | <p>Certainty of ADR</p> <p>Suspicious of a reaction</p> <p>Training</p> <p>Fee for reporting</p> <p>Access to patient records</p> <p>Feedback</p> <p>More time</p>                    |  |
| Green et al., 2001<br>(43) | Questionnaire-based study<br>322<br>United Kingdom | <p>Concern that a doctor gets a copy of reporting form</p> <p>Lack of confidence in discussing the ADR with the prescriber</p> <p>Apprehension about sending in an inappropriate report</p> <p>Lack of time to fill in a report</p> <p>Concern that a report will generate extra work</p>                                                                | <p>Reaction is of a serious nature</p> <p>The reaction is unusual</p> <p>The reaction is to a new product</p> <p>Certainty that the reaction is a ADR</p> <p>The reaction is well</p> |  |

|  |  |                                                                                                                                                                                                                                                                                                                                           |                                                                                                                                                                                                                                                                                                                                                                                                                                     |  |
|--|--|-------------------------------------------------------------------------------------------------------------------------------------------------------------------------------------------------------------------------------------------------------------------------------------------------------------------------------------------|-------------------------------------------------------------------------------------------------------------------------------------------------------------------------------------------------------------------------------------------------------------------------------------------------------------------------------------------------------------------------------------------------------------------------------------|--|
|  |  | <p>The absence of a fee for reporting ADRs</p> <p>Lack of time to actively look for ADRs while in clinical practice</p> <p>Lack of clinical knowledge makes it difficult to decide whether or not an ADR has occurred</p> <p>Don't feel the need to report well recognised reactions</p> <p>Reporting cards not available when needed</p> | <p>recognised for a particular agent</p> <p>Education/training/ study days or evenings</p> <p>More time to spend on wards with patients</p> <p>More feedback, reminders and increased awareness</p> <p>Encouragement from managers and departments</p> <p>Increased collaboration with prescribers and participation on ward round</p> <p>Increased accessibility of reporting cards</p> <p>Cards specifically designed for the</p> |  |
|--|--|-------------------------------------------------------------------------------------------------------------------------------------------------------------------------------------------------------------------------------------------------------------------------------------------------------------------------------------------|-------------------------------------------------------------------------------------------------------------------------------------------------------------------------------------------------------------------------------------------------------------------------------------------------------------------------------------------------------------------------------------------------------------------------------------|--|

|  |  |  |                                                                                                                                                                                                                                                                                                                                                                                                                                                  |  |
|--|--|--|--------------------------------------------------------------------------------------------------------------------------------------------------------------------------------------------------------------------------------------------------------------------------------------------------------------------------------------------------------------------------------------------------------------------------------------------------|--|
|  |  |  | <p>use of pharmacists</p> <p>More publicity in journal about reporting scheme</p> <p>Online access or telephone based reporting</p> <p>Development of local incentives</p> <p>Increased confidence in dealing with medical staff</p> <p>Making reporting a professional responsibility</p> <p>A fee for reporting</p> <p>ADR specialist pharmacists</p> <p>Increasing awareness among other professionals that pharmacists could report ADRs</p> |  |
|--|--|--|--------------------------------------------------------------------------------------------------------------------------------------------------------------------------------------------------------------------------------------------------------------------------------------------------------------------------------------------------------------------------------------------------------------------------------------------------|--|

|                                             |                                                 |                                                                                                                                                                                                                                                                                                                                |                                                                                                                                                                                                                                                                                                                                                         |                                |
|---------------------------------------------|-------------------------------------------------|--------------------------------------------------------------------------------------------------------------------------------------------------------------------------------------------------------------------------------------------------------------------------------------------------------------------------------|---------------------------------------------------------------------------------------------------------------------------------------------------------------------------------------------------------------------------------------------------------------------------------------------------------------------------------------------------------|--------------------------------|
| van Grootheest et al., 2002 <sup>(44)</sup> | Questionnaire-based study<br>147<br>Netherlands | Causality uncertain<br>Too time-consuming<br>No reporting forms available<br>Reporting address unknown<br>Reporting form too complicated<br>All adverse reactions are known<br>Want to publish myself<br>Confidentiality<br>Fear of liability<br>No motivation<br>Insufficient clinical knowledge<br>Do not know how to report | Feedback<br>Publications<br>Information about the national centre<br>Simplification of reporting procedure<br>Promoting reporting as part of professional duty<br>Financial compensation<br>More attention to ADR reporting in university curriculum<br>Database of national centre available on the internet<br>Compulsory reporting<br>Peer reporting | Reporting could show ignorance |
|---------------------------------------------|-------------------------------------------------|--------------------------------------------------------------------------------------------------------------------------------------------------------------------------------------------------------------------------------------------------------------------------------------------------------------------------------|---------------------------------------------------------------------------------------------------------------------------------------------------------------------------------------------------------------------------------------------------------------------------------------------------------------------------------------------------------|--------------------------------|

|                             |                                               |                                                                                                                                                                                                                                                                                                                                                                                                                                                                                                                       |                                                                                                                                                                                                                                                               |  |
|-----------------------------|-----------------------------------------------|-----------------------------------------------------------------------------------------------------------------------------------------------------------------------------------------------------------------------------------------------------------------------------------------------------------------------------------------------------------------------------------------------------------------------------------------------------------------------------------------------------------------------|---------------------------------------------------------------------------------------------------------------------------------------------------------------------------------------------------------------------------------------------------------------|--|
|                             |                                               |                                                                                                                                                                                                                                                                                                                                                                                                                                                                                                                       |                                                                                                                                                                                                                                                               |  |
| Haines et al., 2008<br>(45) | Questionnaire-based study<br>212<br>Australia | Time<br><br>If the ward is very busy<br><br>Patients' responsibility for adverse events<br><br>Cause of the incident<br><br>Other methods of documentation<br><br>Access to previous reports (non filing of incident reports in the notes)<br><br>Poor user friendliness of computer reporter systems<br><br>Made staff feel personally responsible for the form<br><br>Poor access to computers<br><br>Non reporting by role models<br><br>Absence of a definition of a fall<br><br>Blame<br><br>Absence of training | Staff believe that completing IRs improves patient safety<br><br>Staff belief that competing IRs protects against legal liability<br><br>If the patients was harmed/injured<br><br>Patient factors<br><br>Protect staff<br><br>Type of incident - preventable |  |

|                                                 |                                                                                           |                                                                                                                                                                                                                                                                                                                                                                                                                                                                                                                                                                                                                                                                                                                                                                                             |  |  |
|-------------------------------------------------|-------------------------------------------------------------------------------------------|---------------------------------------------------------------------------------------------------------------------------------------------------------------------------------------------------------------------------------------------------------------------------------------------------------------------------------------------------------------------------------------------------------------------------------------------------------------------------------------------------------------------------------------------------------------------------------------------------------------------------------------------------------------------------------------------------------------------------------------------------------------------------------------------|--|--|
| <p>Handler et al.,<br/>2007 <sup>(46)</sup></p> | <p>Focus group and<br/>questionnaire-based study<br/>132<br/>United States of America</p> | <p>Lack of readily available medication<br/>error reporting system or forms</p> <p>Lack of information on how to report<br/>a medication error</p> <p>Lack of feedback to the reporter or<br/>rest of facility on medication errors<br/>that have been reported</p> <p>Lack of knowledge of which<br/>medication errors should be reported</p> <p>Systems or forms used to report<br/>medication error are long and time<br/>consuming</p> <p>Lack of knowledge of the usefulness<br/>of reporting medication errors</p> <p>Lack of a consistent definition of a<br/>medication error</p> <p>Lack of an anonymous medication<br/>error reporting system</p> <p>Lack of recognition that a medication<br/>error has occurred</p> <p>Lack of a culture of reporting<br/>medication errors</p> |  |  |
|-------------------------------------------------|-------------------------------------------------------------------------------------------|---------------------------------------------------------------------------------------------------------------------------------------------------------------------------------------------------------------------------------------------------------------------------------------------------------------------------------------------------------------------------------------------------------------------------------------------------------------------------------------------------------------------------------------------------------------------------------------------------------------------------------------------------------------------------------------------------------------------------------------------------------------------------------------------|--|--|

|                               |                                                            |                                                                                                                                                                                                                                                                                                                                                                                                                                                                                                                                                                                                                                                       |                                       |  |
|-------------------------------|------------------------------------------------------------|-------------------------------------------------------------------------------------------------------------------------------------------------------------------------------------------------------------------------------------------------------------------------------------------------------------------------------------------------------------------------------------------------------------------------------------------------------------------------------------------------------------------------------------------------------------------------------------------------------------------------------------------------------|---------------------------------------|--|
|                               |                                                            | <p>Extra time involved in documenting a medication error</p> <p>Fear of disciplinary action</p> <p>Fear of being blamed</p> <p>Fear of liability or lawsuits</p> <p>Not knowing who is responsible for reporting a medication error</p> <p>Belief that it is unnecessary to report medication errors not associated with patient harm</p> <p>Lack of recognition of the actual or potential harm of a medication error</p> <p>Belief that reporting medication errors has little contribution to improving the quality of care</p> <p>Difficulty in proving that a medication error actually occurred</p> <p>Fear of losing respect of co-workers</p> |                                       |  |
| Hartnell et al., 2012<br>(47) | Focus group and semi-structured interviews<br>30<br>Canada | <p>Extra time required to report</p> <p>Extra work required to report</p>                                                                                                                                                                                                                                                                                                                                                                                                                                                                                                                                                                             | Improved care/improved patient safety |  |



|  |  |                                                                                                                                                                                                                                                                                                                                                                                                                                                                                                                                                                                                                            |                                                                                                                                                                                                                                                                                                                                                          |  |
|--|--|----------------------------------------------------------------------------------------------------------------------------------------------------------------------------------------------------------------------------------------------------------------------------------------------------------------------------------------------------------------------------------------------------------------------------------------------------------------------------------------------------------------------------------------------------------------------------------------------------------------------------|----------------------------------------------------------------------------------------------------------------------------------------------------------------------------------------------------------------------------------------------------------------------------------------------------------------------------------------------------------|--|
|  |  | <p>Cumbersome IR forms</p> <p>Hesitancy about 'telling on' someone else</p> <p>Fear of loss of reputation/perceived incompetence</p> <p>Perceived severity of error (less severe errors are less likely to be reported)</p> <p>Inability to recognise or identify medication errors</p> <p>Lack of definitions or standards for reporting</p> <p>Lack of belief that reporting makes a difference</p> <p>lack of trust about how error reports will be used</p> <p>Reporting is the responsibility of someone else</p> <p>Fear of reprisal from management/administration</p> <p>Fear of exposure to malpractice suits</p> | <p>To prevent patient from receiving wrong medication</p> <p>Provides immunity/protection from legal action</p> <p>Fear of censure (harsh criticism or blame)</p> <p>Perceived severity of error (more severe errors are more likely to be reported because a report will be expected)</p> <p>Follow rules or policies</p> <p>Ensures accountability</p> |  |
|--|--|----------------------------------------------------------------------------------------------------------------------------------------------------------------------------------------------------------------------------------------------------------------------------------------------------------------------------------------------------------------------------------------------------------------------------------------------------------------------------------------------------------------------------------------------------------------------------------------------------------------------------|----------------------------------------------------------------------------------------------------------------------------------------------------------------------------------------------------------------------------------------------------------------------------------------------------------------------------------------------------------|--|

|                                      |                                             |                                                                                                                                                                                                                                                                                                                                                                                                                                                                                             |                                                                                                                                   |                           |
|--------------------------------------|---------------------------------------------|---------------------------------------------------------------------------------------------------------------------------------------------------------------------------------------------------------------------------------------------------------------------------------------------------------------------------------------------------------------------------------------------------------------------------------------------------------------------------------------------|-----------------------------------------------------------------------------------------------------------------------------------|---------------------------|
| Hasford et al., 2002 <sup>(48)</sup> | Questionnaire-based study<br>588<br>Germany | <p>ADR too well known</p> <p>ADR too trivial</p> <p>Uncertain causality</p> <p>Reporting too bureaucratic</p> <p>Lack of time</p> <p>Rules of conduct unknown</p> <p>Suspect that drug prescribed by colleague</p> <p>Reporting process unknown</p> <p>Lack of financial reimbursement</p> <p>Suspect drug was self-medication</p> <p>Reports considered useless</p> <p>Reporting system unknown</p> <p>Fear of legal liability</p> <p>Non-serious adverse reaction to established drug</p> | <p>Serious unknown ADR to a new drug</p> <p>Serious unknown ADR to an established drug</p> <p>Serious known ADR to a new drug</p> |                           |
| Heard et al., 2012 <sup>(49)</sup>   | Questionnaire-based study<br>433            | I am worried about litigation                                                                                                                                                                                                                                                                                                                                                                                                                                                               |                                                                                                                                   | Generalised de-identified |

|  |           |                                                                                                                                                                                                                                                                                                                                                                                                                                                                                                                                                                                                                                                                                                    |  |                                                                                                                                                                                                                                                                                                                                                                                          |
|--|-----------|----------------------------------------------------------------------------------------------------------------------------------------------------------------------------------------------------------------------------------------------------------------------------------------------------------------------------------------------------------------------------------------------------------------------------------------------------------------------------------------------------------------------------------------------------------------------------------------------------------------------------------------------------------------------------------------------------|--|------------------------------------------------------------------------------------------------------------------------------------------------------------------------------------------------------------------------------------------------------------------------------------------------------------------------------------------------------------------------------------------|
|  | Australia | <p>I don't want to get into trouble</p> <p>My colleagues may be unsupportive</p> <p>I am worried about disciplinary action</p> <p>I may be blamed unfairly for the event</p> <p>I do not want to be discussed in meetings.</p> <p>Adverse events reporting makes little contribution to quality care</p> <p>I don't know whose responsibility it is to make a report</p> <p>A good outcome of the case makes reporting unnecessary</p> <p>I do not know which adverse events should be reported.</p> <p>Even if I don't give my details I'm worried they will track me down</p> <p>The forms take too long to fill in and just don't have time</p> <p>When I am busy I forget to make a report</p> |  | <p>feedback about reports received from the anaesthetic community</p> <p>Role models e.g. senior colleagues and department directors who openly encourage reporting</p> <p>Legislated protection of information you provide from use in litigation</p> <p>Ability to report anonymously</p> <p>Clear guidelines about what adverse events are errors to report</p> <p>Information on</p> |
|--|-----------|----------------------------------------------------------------------------------------------------------------------------------------------------------------------------------------------------------------------------------------------------------------------------------------------------------------------------------------------------------------------------------------------------------------------------------------------------------------------------------------------------------------------------------------------------------------------------------------------------------------------------------------------------------------------------------------------------|--|------------------------------------------------------------------------------------------------------------------------------------------------------------------------------------------------------------------------------------------------------------------------------------------------------------------------------------------------------------------------------------------|

|  |  |                                                                                                                                                                                                                                                                                                                                                                                                                                                                                                                                                                                                                                                                                                                                                                                         |  |                                                                                                                                                                                                                                                                                                                                                     |
|--|--|-----------------------------------------------------------------------------------------------------------------------------------------------------------------------------------------------------------------------------------------------------------------------------------------------------------------------------------------------------------------------------------------------------------------------------------------------------------------------------------------------------------------------------------------------------------------------------------------------------------------------------------------------------------------------------------------------------------------------------------------------------------------------------------------|--|-----------------------------------------------------------------------------------------------------------------------------------------------------------------------------------------------------------------------------------------------------------------------------------------------------------------------------------------------------|
|  |  | <p>I don't feel confident that the information I provide will be kept confidential</p> <p>I never get any feedback after I report an adverse event</p> <p>I wonder about who else will have access to information I disclose</p> <p>As long as the staff involved learn from incidents it is unnecessary to discuss them further</p> <p>I would protect my self-interests ahead of the interests of the patient if I could (by hiding or denying error)</p> <p>Competition with my peers could prevent me from disclosing an error</p> <p>If a doctor is careful enough he or she will not make an error</p> <p>It would affect my identity as a doctor to admit to an error</p> <p>Other don't need to know about errors I have made</p> <p>Disclosing an error, if you don't have</p> |  | <p>how confidentiality will be maintained if you supply your name</p> <p>Individualised feedback to you about reports you submit</p> <p>Paper forms for reporting provided in each theatre</p> <p>More support from colleagues</p> <p>Less blame attached to those who report errors</p> <p>ANZCA continuing professional development point for</p> |
|--|--|-----------------------------------------------------------------------------------------------------------------------------------------------------------------------------------------------------------------------------------------------------------------------------------------------------------------------------------------------------------------------------------------------------------------------------------------------------------------------------------------------------------------------------------------------------------------------------------------------------------------------------------------------------------------------------------------------------------------------------------------------------------------------------------------|--|-----------------------------------------------------------------------------------------------------------------------------------------------------------------------------------------------------------------------------------------------------------------------------------------------------------------------------------------------------|

|  |  |                                                                                                                                                                                                                                                                                                                                                                                                                                                                       |                                                                                                                                                                                                                                                                                                                             |
|--|--|-----------------------------------------------------------------------------------------------------------------------------------------------------------------------------------------------------------------------------------------------------------------------------------------------------------------------------------------------------------------------------------------------------------------------------------------------------------------------|-----------------------------------------------------------------------------------------------------------------------------------------------------------------------------------------------------------------------------------------------------------------------------------------------------------------------------|
|  |  | <p>to, is an optional act of heroism</p> <p>I would cover up an error I had made if I could</p> <p>If I admit to an error I will feel like a failure</p> <p>It would affect my self-esteem to admit to an error</p> <p>Doctors who make errors are humiliated by their colleagues</p> <p>Medicine has a culture of silence where errors are not talked about</p> <p>Doctors who make errors are blamed by their colleagues</p> <p>Doctors should not make errors.</p> | <p>reports.</p> <p>Access to computer based reporting systems for home</p> <p>Education about the purpose of reporting</p> <p>Computer based reporting systems</p> <p>Training on how to use computer based system</p> <p>Training on how to fill in papers forms for reporting</p> <p>Payment for time taken to report</p> |
|--|--|-----------------------------------------------------------------------------------------------------------------------------------------------------------------------------------------------------------------------------------------------------------------------------------------------------------------------------------------------------------------------------------------------------------------------------------------------------------------------|-----------------------------------------------------------------------------------------------------------------------------------------------------------------------------------------------------------------------------------------------------------------------------------------------------------------------------|

|                                       |                                              |                                             |                                                                                                                                                                                                                                                                                                     |                                                                                                                                                                                                                                                                                                                                            |
|---------------------------------------|----------------------------------------------|---------------------------------------------|-----------------------------------------------------------------------------------------------------------------------------------------------------------------------------------------------------------------------------------------------------------------------------------------------------|--------------------------------------------------------------------------------------------------------------------------------------------------------------------------------------------------------------------------------------------------------------------------------------------------------------------------------------------|
| Herdeiro et al., 2006 <sup>(50)</sup> | Questionnaire-based study<br>256<br>Portugal | Lack of time<br><br>Complexity of reporting | Workplace (hospital pharmacists more likely to report than community pharmacists)<br><br>Really serious ADRs are not well documented by the time a drug is marketed'<br><br>Serious and not expected ADRs<br><br>Report an ADR if I were unsure that it was related to the use of a particular drug | Gender<br><br>Age<br><br>Job function (registered, assistant or other pharmacists)<br><br>Possible to determine if a drug is responsible for a particular adverse reaction'<br><br>Cannot contribute to pharmaceutical knowledge<br><br>Interested in articles about ADRs'<br><br>Most correct way to report ADRs in is the pharmaceutical |
|---------------------------------------|----------------------------------------------|---------------------------------------------|-----------------------------------------------------------------------------------------------------------------------------------------------------------------------------------------------------------------------------------------------------------------------------------------------------|--------------------------------------------------------------------------------------------------------------------------------------------------------------------------------------------------------------------------------------------------------------------------------------------------------------------------------------------|

|  |  |  |  |                                                                                                                                                                                                                                                                                                                                                                             |
|--|--|--|--|-----------------------------------------------------------------------------------------------------------------------------------------------------------------------------------------------------------------------------------------------------------------------------------------------------------------------------------------------------------------------------|
|  |  |  |  | <p>literature</p> <p>Financially reimbursement for providing the ADR service</p> <p>Professional obligation to report ADRs</p> <p>Reporting ADRs puts career at risk</p> <p>I do not have time to complete the report card</p> <p>I do not know how the information in the report card is used</p> <p>I talk to pharmaceutical companies about possible ADRs with their</p> |
|--|--|--|--|-----------------------------------------------------------------------------------------------------------------------------------------------------------------------------------------------------------------------------------------------------------------------------------------------------------------------------------------------------------------------------|

|                                           |                                                              |                                                                                                                                                                                                                                                                                                                                                           |                                                                                                                                                                                                                     |                                                 |
|-------------------------------------------|--------------------------------------------------------------|-----------------------------------------------------------------------------------------------------------------------------------------------------------------------------------------------------------------------------------------------------------------------------------------------------------------------------------------------------------|---------------------------------------------------------------------------------------------------------------------------------------------------------------------------------------------------------------------|-------------------------------------------------|
|                                           |                                                              |                                                                                                                                                                                                                                                                                                                                                           |                                                                                                                                                                                                                     | drugs                                           |
| Hohenhaus et al.,<br>2008 <sup>(51)</sup> | Questionnaire-based study<br>175<br>United States of America | <p>Afraid to report a medical error they had made</p> <p>Afraid to report a medical error made by someone else</p> <p>Might not report if there was no harm to the patient and the error was recognised quickly</p> <p>Might not report if a physician told them not to report the error</p> <p>Would not report if their supervisor told them not to</p> | <p>Error resulting patient harm</p> <p>Error by novice nurse</p>                                                                                                                                                    |                                                 |
| Holmstrom et al.,<br>2012 <sup>(52)</sup> | Questionnaire-based study<br>16<br>United Kingdom            | <p>Fear of consequences</p> <p>Culture of blame</p> <p>Lack of training in MER for health-care professionals</p> <p>Lack of time for reporting</p> <p>Lack of organizational leadership and support</p> <p>Lack of legal protection for individual health-care professionals who have</p>                                                                 | <p>Provides opportunity for evaluating causes of errors (e.g. root cause analysis)</p> <p>Uses a non-punitive approach to reporting</p> <p>Provides feedback of results of error analysis for those involved in</p> | <p>Paper-based</p> <p>Quick and easy to use</p> |



|  |  |                                                                                                                                                                                                                                                                       |                                                                                                                                                                                                                                                                                                                                                                                            |  |
|--|--|-----------------------------------------------------------------------------------------------------------------------------------------------------------------------------------------------------------------------------------------------------------------------|--------------------------------------------------------------------------------------------------------------------------------------------------------------------------------------------------------------------------------------------------------------------------------------------------------------------------------------------------------------------------------------------|--|
|  |  | <p>made an error</p> <p>Lack of understanding why reporting is needed</p> <p>Concern that no beneficial action will follow</p> <p>Non-anonymous reporting</p> <p>Perceived to be bureaucratic</p> <p>Lack of health-care staff</p> <p>Lack of financial resources</p> | <p>reporting</p> <p>Easy to use</p> <p>Provides opportunity for error data analysis</p> <p>Produces recommendations and guidelines for improving medication safety</p> <p>Provides confidentiality of reported information</p> <p>Provided and maintained by one national organisation</p> <p>Integral part of patient safety reporting system</p> <p>Reporting of errors is voluntary</p> |  |
|--|--|-----------------------------------------------------------------------------------------------------------------------------------------------------------------------------------------------------------------------------------------------------------------------|--------------------------------------------------------------------------------------------------------------------------------------------------------------------------------------------------------------------------------------------------------------------------------------------------------------------------------------------------------------------------------------------|--|

|                                         |                                                                                                                                             |  |                                                                                                                                                                                                                                                                                                                                        |                                                                                               |
|-----------------------------------------|---------------------------------------------------------------------------------------------------------------------------------------------|--|----------------------------------------------------------------------------------------------------------------------------------------------------------------------------------------------------------------------------------------------------------------------------------------------------------------------------------------|-----------------------------------------------------------------------------------------------|
|                                         |                                                                                                                                             |  | <p>Reporting of errors is mandatory</p> <p>Allows all healthcare professionals to report errors</p> <p>Available in electronic format</p> <p>Independent reporting system dedicated for medication error reporting</p> <p>Provides a choice of reporting anonymously</p> <p>Includes reporting of both potential and actual errors</p> |                                                                                               |
| Hutchinson et al., 2009 <sup>(53)</sup> | <p>Retrospective analysis of routinely collected data and questionnaire-based study</p> <p>Sample size not stated</p> <p>United Kingdom</p> |  | <p>Employer treats fairly staff involved in error near miss or incident</p> <p>Employer encourages staff to</p>                                                                                                                                                                                                                        | <p>Knows how to report errors, near misses and incidents</p> <p>When errors are reported,</p> |

|                                    |                                                  |                                                                                                               |                                                                                                                                                                                                                                                                                                                                                |                                                                            |
|------------------------------------|--------------------------------------------------|---------------------------------------------------------------------------------------------------------------|------------------------------------------------------------------------------------------------------------------------------------------------------------------------------------------------------------------------------------------------------------------------------------------------------------------------------------------------|----------------------------------------------------------------------------|
|                                    |                                                  |                                                                                                               | <p>report errors, near misses or incidents</p> <p>Employer treats reports of errors, near misses or incidents confidentially</p> <p>Employer does not blame or punish people who make errors.</p> <p>Access to a counselling service were also more likely to report.</p> <p>Previous reporting behaviours</p> <p>Level of risk management</p> | <p>employer takes action to ensure that they do not happen again</p>       |
| Irujo et al., 2007 <sup>(54)</sup> | <p>Case control study</p> <p>78</p> <p>Spain</p> | <p>Not serious ADR</p> <p>Already well known ADR</p> <p>Uncertain about causality</p> <p>Forgot to report</p> |                                                                                                                                                                                                                                                                                                                                                | <p>Age</p> <p>Working experience as pharmacist</p> <p>Participation in</p> |

|  |  |              |  |                                                                                                                                                                                                                                                                                                                                                                                                  |
|--|--|--------------|--|--------------------------------------------------------------------------------------------------------------------------------------------------------------------------------------------------------------------------------------------------------------------------------------------------------------------------------------------------------------------------------------------------|
|  |  | Lack of time |  | <p>a programme for detection and resolution of DRPs</p> <p>Education on detection and resolution of DRPs</p> <p>Frequently considering the possibility of finding an ADR when attending a patient with symptoms</p> <p>Forgetting to report</p> <p>Education for ADR reporting</p> <p>Awareness of the importance of reporting system</p> <p>It is necessary to be sure that the reaction is</p> |
|--|--|--------------|--|--------------------------------------------------------------------------------------------------------------------------------------------------------------------------------------------------------------------------------------------------------------------------------------------------------------------------------------------------------------------------------------------------|

|                                    |                                                          |                                                                                                                                                                                                                                                                                                                                                                                                                         |                                                                                                                                                                                                                                                                                               |                                                                                             |
|------------------------------------|----------------------------------------------------------|-------------------------------------------------------------------------------------------------------------------------------------------------------------------------------------------------------------------------------------------------------------------------------------------------------------------------------------------------------------------------------------------------------------------------|-----------------------------------------------------------------------------------------------------------------------------------------------------------------------------------------------------------------------------------------------------------------------------------------------|---------------------------------------------------------------------------------------------|
|                                    |                                                          |                                                                                                                                                                                                                                                                                                                                                                                                                         |                                                                                                                                                                                                                                                                                               | causally related to the use of a particular drug<br><br>Basic knowledge about ADR reporting |
| <p>Jeffe et al., 2004<br/>(55)</p> | <p>Focus groups<br/>109<br/>United States of America</p> | <p>Not knowing what to report</p> <p>Errors that pose little risk to the patient</p> <p>Errors that do not end up harming the patient</p> <p>Not knowing how to report</p> <p>Fear of disciplinary repercussions (nurse and physicians)</p> <p>Fear of legal repercussions (nurse and physicians)</p> <p>Fear of repercussions from doctors (nurses)</p> <p>Link between reporting and performance reviews (nurses)</p> | <p>Severity of the situation (nurses)</p> <p>Likelihood of reoccurrence (nurses)</p> <p>Severe events reported as the error would be 'found' out anyway</p> <p>Self-protection</p> <p>The importance of reporting errors for educational purposes</p> <p>Anonymous (physician and nurses)</p> |                                                                                             |

|                                       |                                                                                               |                                                                                                                                                                                                                                                        |                                                                                                                                                                                                                                                                                                         |  |
|---------------------------------------|-----------------------------------------------------------------------------------------------|--------------------------------------------------------------------------------------------------------------------------------------------------------------------------------------------------------------------------------------------------------|---------------------------------------------------------------------------------------------------------------------------------------------------------------------------------------------------------------------------------------------------------------------------------------------------------|--|
|                                       |                                                                                               | Protecting colleagues from disciplinary action(nurses)<br>Lack of confidentiality<br>Name, blame, shame culture<br>Fear of public exposure<br>Staff shortages<br>Lack of time<br>The lack of simple procedure for reporting errors<br>Lack of feedback | Simple (physician and nurses)<br>Fast reporting procedures(physician and nurses)<br>Receipt of critical feedback about the errors<br>Anonymous, phone in system (physicians)<br>Educational rather than punitive system (physicians)<br>System that was 'lawyer proof'<br>Blame free reporting (nurses) |  |
| Jennings et al., 2011 <sup>(56)</sup> | Focus groups, interviews and questionnaire based study<br>Sample size not stated<br>Australia | Burden of reporting in terms of time<br>Lack of accessibility of reporting forms                                                                                                                                                                       | Clarity of indemnity from prosecution                                                                                                                                                                                                                                                                   |  |

|                                        |                                                                           |                                                                                                                                                                                                                                                                                                                                                                                                                                                                                                            |                              |  |
|----------------------------------------|---------------------------------------------------------------------------|------------------------------------------------------------------------------------------------------------------------------------------------------------------------------------------------------------------------------------------------------------------------------------------------------------------------------------------------------------------------------------------------------------------------------------------------------------------------------------------------------------|------------------------------|--|
|                                        |                                                                           | <p>Time elapsed following incident</p> <p>Priority of reporting over other work tasks</p> <p>Forgetting to report</p> <p>Workload</p> <p>Fear of disciplinary action</p> <p>Fear of potential litigation</p> <p>Fear of breaches of confidentiality/anonymity</p> <p>Fear of embarrassment within peer group</p> <p>Fear that incidents may impact on their likelihood of promotion</p> <p>Concern that nothing would change even if the incident was reported</p> <p>Lack of familiarity with process</p> |                              |  |
| Johnstone et al., 2008 <sup>(57)</sup> | Focus groups, semi-structured interviews and questionnaire-based study 35 | Frequency of incident-more frequent less likely to report                                                                                                                                                                                                                                                                                                                                                                                                                                                  | Seniority of graduate nurses |  |

|                                      |                                            |                                                                                                                                          |                                                                                                                                                                                                                                              |                           |
|--------------------------------------|--------------------------------------------|------------------------------------------------------------------------------------------------------------------------------------------|----------------------------------------------------------------------------------------------------------------------------------------------------------------------------------------------------------------------------------------------|---------------------------|
|                                      | Australia                                  |                                                                                                                                          |                                                                                                                                                                                                                                              |                           |
| Joolaee et al., 2011 <sup>(58)</sup> | Questionnaire-based study<br>286<br>Iran   |                                                                                                                                          |                                                                                                                                                                                                                                              | Perceived work conditions |
| Kagan et al., 2008 <sup>(59)</sup>   | Questionnaire-based study<br>201<br>Israel | The practice of ward nurse managers to cover up error, that is dealing with the error themselves without reporting to a higher authority | How the ward's and hospital's dealt with medication error<br><br>How their ward handles error reporting                                                                                                                                      |                           |
| Kagan et al., 2013 <sup>(60)</sup>   | Questionnaire-based study<br>247<br>Israel | Medical error incidence                                                                                                                  | Patient safety culture index<br><br>PSC at organisational level<br><br>PSC at departmental level<br><br>PSC at respondents personal performance level<br><br>Nurses' place of birth and their professional status (academic or non-academic) |                           |



|                                          |                                                              |                                                                                                                                                                                         |                                                                                                                                                                                                                           |  |
|------------------------------------------|--------------------------------------------------------------|-----------------------------------------------------------------------------------------------------------------------------------------------------------------------------------------|---------------------------------------------------------------------------------------------------------------------------------------------------------------------------------------------------------------------------|--|
|                                          |                                                              |                                                                                                                                                                                         | registered nurse)                                                                                                                                                                                                         |  |
| Kaldjian et al.,<br>2009 <sup>(61)</sup> | Questionnaire-based study<br>338<br>United States of America |                                                                                                                                                                                         | Feedback                                                                                                                                                                                                                  |  |
| Karsh et al., 2006<br><sup>(62)</sup>    | Focus group<br>14<br>United States of America                | Length of report<br><br>Punishment<br><br>Reporting near misses                                                                                                                         | Feedback<br><br>Mandatory system<br><br>Financial incentives<br><br>Other incentives<br>(protection from<br>malpractice and<br>disciplinary action)<br><br>Support in using<br>system<br><br>Education in using<br>system |  |
| Kennedy et al.,<br>2004 <sup>(63)</sup>  | Questionnaire-based study<br>113<br>United States of America | Not their responsibility to report<br><br>Never thought to report/not required<br>to do so<br><br>Handle errors internally i.e. no<br>corporate system<br><br>No errors worth reporting |                                                                                                                                                                                                                           |  |

|                                   |                                                                |                                                                                                                                                                                                                                                                                                                                                                                                                                                                                                         |  |  |
|-----------------------------------|----------------------------------------------------------------|---------------------------------------------------------------------------------------------------------------------------------------------------------------------------------------------------------------------------------------------------------------------------------------------------------------------------------------------------------------------------------------------------------------------------------------------------------------------------------------------------------|--|--|
|                                   |                                                                | <p>No time to report</p> <p>Forms not available or convenient</p>                                                                                                                                                                                                                                                                                                                                                                                                                                       |  |  |
| Khan, 2013 <sup>(64)</sup>        | <p>Questionnaire-based study</p> <p>50</p> <p>Saudi Arabia</p> | <p>Unavailability of professional environment to discuss ADR</p> <p>Reporting forms are not available</p> <p>I do not know how to report</p> <p>Reporting forms are too complicated</p> <p>Reporting is time consuming</p> <p>I am not motivated to report</p> <p>I fear legal liability of the reported ADR</p> <p>I am not confident whether it is an ADR</p> <p>Insufficient knowledge of pharmacotherapy in detecting ADR</p> <p>Belief that only safe drugs are marketed-not cause of reaction</p> |  |  |
| King et al., 2006 <sup>(65)</sup> | <p>Questionnaire-based study</p> <p>39</p>                     | <p>Time constraints</p>                                                                                                                                                                                                                                                                                                                                                                                                                                                                                 |  |  |

|                                       |                                 |                                                                                                                                                                                                                                                                                                                                                                                                       |                                                                                                                                                                                                                                                                                         |  |
|---------------------------------------|---------------------------------|-------------------------------------------------------------------------------------------------------------------------------------------------------------------------------------------------------------------------------------------------------------------------------------------------------------------------------------------------------------------------------------------------------|-----------------------------------------------------------------------------------------------------------------------------------------------------------------------------------------------------------------------------------------------------------------------------------------|--|
|                                       | United States of America        | <p>Difficulty locating forms</p> <p>Lack of closure/feedback</p> <p>Not important</p> <p>Fear of disclosure to risk management</p>                                                                                                                                                                                                                                                                    |                                                                                                                                                                                                                                                                                         |  |
| Kingston et al., 2004 <sup>(66)</sup> | Focus groups<br>33<br>Australia | <p>Lack of knowledge about the reporting process and</p> <p>Lack of knowledge about what constitutes an incident</p> <p>"Nursing form" by association (not identified as being part of doctors role)</p> <p>Time constraint</p> <p>Complexity of reporting form</p> <p>Lack of feedback</p> <p>Lack of legal privileges afforded to the reporting process</p> <p>Culture of blame</p> <p>No value</p> | <p>Effective and efficient IRS</p> <p>IRS with threat or blame</p> <p>Prompt, relevant feedback</p> <p>IRS that drive improvements</p> <p>Monetary payment</p> <p>Simplification</p> <p>Less time consuming</p> <p>Clear definitions of what constitutes an adverse event/near-miss</p> |  |

|                  |                           |                                    |                                                                                                                                                                                                                                                                                                                                                                                        |  |
|------------------|---------------------------|------------------------------------|----------------------------------------------------------------------------------------------------------------------------------------------------------------------------------------------------------------------------------------------------------------------------------------------------------------------------------------------------------------------------------------|--|
|                  |                           |                                    | <p>Evidence of value of IRS</p> <p>Reporting process to be made more relevant to doctors</p> <p>Reporting process less threatening by renaming the form</p> <p>Increased awareness and knowledge of IR process</p> <p>Protection from liability</p> <p>System that doesn't require input from doctors (nurses)</p> <p>Education at orientation (nurses)</p> <p>Anonymous reporting</p> |  |
| Kreckler et al., | Questionnaire-based study | I am too busy to fill out the form |                                                                                                                                                                                                                                                                                                                                                                                        |  |

|                                 |                                            |                                                                                                                                                                                                                                                                                                                                                                 |                                                                                                                                                                             |  |
|---------------------------------|--------------------------------------------|-----------------------------------------------------------------------------------------------------------------------------------------------------------------------------------------------------------------------------------------------------------------------------------------------------------------------------------------------------------------|-----------------------------------------------------------------------------------------------------------------------------------------------------------------------------|--|
| 2009 <sup>(67)</sup>            | 137<br>United Kingdom                      | <p>The form takes too long to complete</p> <p>I am worried about litigation</p> <p>I do not want the case discussed in meetings</p> <p>I never get any feedback</p> <p>It makes little contribution to the quality of care</p> <p>I am not sure what incidents to report</p> <p>The incident was too trivial</p> <p>The incident did not result in any harm</p> |                                                                                                                                                                             |  |
| Li et al., 2004 <sup>(68)</sup> | Questionnaire-based study<br>1653<br>China | <p>Address of reporting agency not available</p> <p>Report forms unavailable</p> <p>Reporting process unknown</p> <p>Unaware of a national ADR reporting system</p> <p>Patient confidentiality</p>                                                                                                                                                              | <p>Increasing awareness among administrators, doctors &amp; nurses</p> <p>Establishing ADR institutes</p> <p>Education and training in ADR knowledge and related topics</p> |  |

|                                                |                                       |                                                                                                                                                                                                                                                                                                                                  |                                                                                                                                                                                                                                                              |  |
|------------------------------------------------|---------------------------------------|----------------------------------------------------------------------------------------------------------------------------------------------------------------------------------------------------------------------------------------------------------------------------------------------------------------------------------|--------------------------------------------------------------------------------------------------------------------------------------------------------------------------------------------------------------------------------------------------------------|--|
|                                                |                                       | <p>Too busy to report ADR</p> <p>ADR sufficiently well documented</p> <p>Reluctant to admit that they have caused a patient harm</p> <p>Worried about feeling foolish</p> <p>Reluctant to admit they may have made a medical error</p> <p>Personal ambition to publish a case study</p>                                          |                                                                                                                                                                                                                                                              |  |
| <p>Martowirono et al., 2012<sup>(69)</sup></p> | <p>Focus group 22<br/>Netherlands</p> | <p>Negatively valued</p> <p>Costs time</p> <p>Perceived as another administrative task that they have to complete</p> <p>Priority</p> <p>Do not always agree with the definition of incident</p> <p>Incidents that had no major patient consequence</p> <p>Incidents that have happened before and has already been reported</p> | <p>Reporting process-ability to report over the phone or send an email</p> <p>Anonymous reporting</p> <p>Provide the possibility to report without identifying the person involved</p> <p>Provide feedback</p> <p>Provide feedback to the reporter if an</p> |  |

|  |  |                                                                                                                                                                                                                                                                                                                                                                                                                                                                                                                                                                                                      |                                                                                                                                                                                                                                                                                                                                                                                                                                                                                 |  |
|--|--|------------------------------------------------------------------------------------------------------------------------------------------------------------------------------------------------------------------------------------------------------------------------------------------------------------------------------------------------------------------------------------------------------------------------------------------------------------------------------------------------------------------------------------------------------------------------------------------------------|---------------------------------------------------------------------------------------------------------------------------------------------------------------------------------------------------------------------------------------------------------------------------------------------------------------------------------------------------------------------------------------------------------------------------------------------------------------------------------|--|
|  |  | <p>Incidents that was not preventable</p> <p>The cause of the incident Is already clear</p> <p>Incidents is unlikely to happen again</p> <p>Was not an incident but a complication</p> <p>Incident already been discussed with the people involved</p> <p>The lack of feedback on a report</p> <p>Absence of visible system changes were also issues</p> <p>Disloyal to colleagues</p> <p>Not their responsibility</p> <p>legal liability</p> <p>Unpleasant working conditions</p> <p>Lack of encouragement from superiors to report incidents.</p> <p>Incident reporting is emotionally charged</p> | <p>incident on how the report will be handled</p> <p>Feedback-communicate the results in terms of systems changes</p> <p>Create an incident reporting culture</p> <p>Create a culture in which IR is less emotionally charged e.g. by systematically discussing IR within a ward and stimulating role of supervisors</p> <p>Simplify the procedure</p> <p>Design a procedure in which it is possible to only report the essentials of an incident, e.g. by making a call or</p> |  |
|--|--|------------------------------------------------------------------------------------------------------------------------------------------------------------------------------------------------------------------------------------------------------------------------------------------------------------------------------------------------------------------------------------------------------------------------------------------------------------------------------------------------------------------------------------------------------------------------------------------------------|---------------------------------------------------------------------------------------------------------------------------------------------------------------------------------------------------------------------------------------------------------------------------------------------------------------------------------------------------------------------------------------------------------------------------------------------------------------------------------|--|

|                           |                                                              |                                                                                                                                                                                                                              |                                                                                                                                                                                                                                                                                                                                                                                                                        |  |
|---------------------------|--------------------------------------------------------------|------------------------------------------------------------------------------------------------------------------------------------------------------------------------------------------------------------------------------|------------------------------------------------------------------------------------------------------------------------------------------------------------------------------------------------------------------------------------------------------------------------------------------------------------------------------------------------------------------------------------------------------------------------|--|
|                           |                                                              | <p>Some residents stated that they did not complete IR because they did not think of it whereas others said</p> <p>Did not know what to report.</p> <p>Did not know how to report</p> <p>IRS complicated</p> <p>Workload</p> | <p>filing out a card or compact form with standard incidents. If necessary, the resident can be contacted for more information</p> <p>Make it easy for a resident to find out if an incident has already been reported</p> <p>Clarification what to report</p> <p>Clarification about and how to report</p> <p>Excite residents to report</p> <p>Draw attention to IR e.g. putting up posters with a catchy slogan</p> |  |
| Mayo et al., 2004<br>(70) | Questionnaire-based study<br>983<br>United States of America | <p>Afraid of manager reaction</p> <p>Afraid of co-workers' reactions</p>                                                                                                                                                     |                                                                                                                                                                                                                                                                                                                                                                                                                        |  |



|                                       |                                                                   |                                                                                                                                                                                                                                  |  |                                                                              |
|---------------------------------------|-------------------------------------------------------------------|----------------------------------------------------------------------------------------------------------------------------------------------------------------------------------------------------------------------------------|--|------------------------------------------------------------------------------|
|                                       |                                                                   | <p>Not thinking an error was serious enough</p> <p>Fear of disciplinary action</p>                                                                                                                                               |  |                                                                              |
| McArdle et al., 2003 <sup>(71)</sup>  | <p>Semi-structured interviews</p> <p>15</p> <p>United Kingdom</p> | <p>It takes too long</p> <p>Lack of feedback received</p> <p>Lack on incentive</p> <p>Cumbersome</p> <p>Non-anonymous</p> <p>Fear of blame</p> <p>Description of medication did not fall into IRS formats-scope of reporting</p> |  |                                                                              |
| Merchant et al., 2005 <sup>(72)</sup> | <p>Questionnaire-based study</p> <p>207</p> <p>Canada</p>         | <p>I think of reporting too late</p> <p>Don't know where CIRS forms are</p> <p>Fear of lawyers getting information</p> <p>I don't know what sort of incident to report</p> <p>I'm too busy</p> <p>Fear of record of problem</p>  |  | <p>Unnecessary as anesthesia is safe</p> <p>futile as anesthesia is safe</p> |

|                                         |                                            |                                                                                                                                                                                                                                                                                                                                                                                                                                           |  |  |
|-----------------------------------------|--------------------------------------------|-------------------------------------------------------------------------------------------------------------------------------------------------------------------------------------------------------------------------------------------------------------------------------------------------------------------------------------------------------------------------------------------------------------------------------------------|--|--|
|                                         |                                            | <p>Don't have CIRS forms</p> <p>My incidents are too minor</p> <p>Too long</p> <p>No value will come of this</p> <p>Too much writing</p> <p>Incidents I see are other's problem</p> <p>Too many tick boxes</p> <p>Unsure what 'critical incident' is</p> <p>Effort is doomed to failure</p> <p>Too difficult</p> <p>Form is confusing</p> <p>Unimportant to me</p> <p>Nothing can be learned from me</p> <p>CIRS asks wrong questions</p> |  |  |
| Mrayyan et al.,<br>2007 <sup>(73)</sup> | Questionnaire-based study<br>779<br>Jordan | <p>Fear of disciplinary action/lose job</p> <p>Errors not serious to warrant</p>                                                                                                                                                                                                                                                                                                                                                          |  |  |

|                                      |                                              |                                                                                               |                                                                                                                        |                                                                                  |
|--------------------------------------|----------------------------------------------|-----------------------------------------------------------------------------------------------|------------------------------------------------------------------------------------------------------------------------|----------------------------------------------------------------------------------|
|                                      |                                              | reporting<br><br>Fear of reaction from co-workers<br><br>Fear of reaction from nurse managers |                                                                                                                        |                                                                                  |
| Mustafa et al., 2013 <sup>(74)</sup> | Questionnaire-based study<br>136<br>Pakistan | Uncertain association<br><br>Awareness<br><br>Concern about legal liability                   | Seriousness of ADRs<br><br>Unusual reaction<br><br>Reaction to a new product<br><br>Confidence in the diagnosis of ADR |                                                                                  |
| Naveh et al., 2006 <sup>(75)</sup>   | Questionnaire-based study<br>632<br>Israel   | Perceived safety procedures                                                                   | Perceived safety information flow                                                                                      | Perceived priority of safety<br><br>Unit type                                    |
| Okuyama et al., 2010 <sup>(76)</sup> | Questionnaire-based study<br>430<br>Japan    |                                                                                               | Safety management at ward level                                                                                        | Safety management at the hospital level<br><br>Attitudes of ward safety managers |

|                                      |                                                             |                                                                                                                                                                                                                                                                                                                                                                                                                                                                       |                                                                                                                                                                                                                                                                                                                                               |                                  |
|--------------------------------------|-------------------------------------------------------------|-----------------------------------------------------------------------------------------------------------------------------------------------------------------------------------------------------------------------------------------------------------------------------------------------------------------------------------------------------------------------------------------------------------------------------------------------------------------------|-----------------------------------------------------------------------------------------------------------------------------------------------------------------------------------------------------------------------------------------------------------------------------------------------------------------------------------------------|----------------------------------|
| Osborne et al., 1999 <sup>(77)</sup> | Questionnaire-based study<br>57<br>United States of America | Error not serious<br><br>Afraid of repercussions<br><br>Afraid of reactions from managers/co-workers                                                                                                                                                                                                                                                                                                                                                                  |                                                                                                                                                                                                                                                                                                                                               | Perceptions of medication errors |
| Parvizi et al., 2014 <sup>(78)</sup> | Questionnaire-based study<br>119<br>United Kingdom          | Did not know they were expected to do this<br><br>Did not know how to report to MHRA<br><br>I do not see the purpose of reporting<br><br>Lack of time<br><br>Blame<br><br>Direct reporting to the manufacturer<br><br>Not reporting if the types of device failure were considered to be common knowledge<br><br>Reporting only those that were unexpected failures or failures that may affect the patient or user<br><br>Reported by either a nurse or other doctor | Better education of the means of adverse IR<br><br>Improvements in the feedback sent to the reporter on the outcomes of the adverse incidents<br><br>Improvements in the guidance on the type of adverse device related incidents to report<br><br>Improvements in the electronic means of adverse IR<br><br>Improvements in the clinical and |                                  |

|                                        |                                                             |                                                                                                                                                                                                                                                                                                                                                                                                                                                                                                                                                                                                  |                              |  |
|----------------------------------------|-------------------------------------------------------------|--------------------------------------------------------------------------------------------------------------------------------------------------------------------------------------------------------------------------------------------------------------------------------------------------------------------------------------------------------------------------------------------------------------------------------------------------------------------------------------------------------------------------------------------------------------------------------------------------|------------------------------|--|
|                                        |                                                             |                                                                                                                                                                                                                                                                                                                                                                                                                                                                                                                                                                                                  | adverse incidence governance |  |
| Patrician et al., 2009 <sup>(79)</sup> | Questionnaire-based study<br>43<br>United States of America | <p>Perceptions that the administration focuses on the individual and not the system</p> <p>Nurses are blamed when something bad happened to patients</p> <p>Fear adverse consequences for reporting errors</p> <p>Nurses believe that their peers will think them incompetent</p> <p>Nurses do not think the error was important enough to report</p> <p>Fear of administrative response</p> <p>Disagreement over error</p> <p>Reporting effort</p> <p>Lack of agreement about definition of error</p> <p>Lack of error recognition</p> <p>Excessive length of time for contacting physician</p> |                              |  |
| Rasmussen et al.,                      | Questionnaire-based study                                   |                                                                                                                                                                                                                                                                                                                                                                                                                                                                                                                                                                                                  | Safety climate               |  |

|                                        |                                                               |                                                                                                                                                                                                                                                                                                                                                                                            |                                                                                                          |                                           |
|----------------------------------------|---------------------------------------------------------------|--------------------------------------------------------------------------------------------------------------------------------------------------------------------------------------------------------------------------------------------------------------------------------------------------------------------------------------------------------------------------------------------|----------------------------------------------------------------------------------------------------------|-------------------------------------------|
| 2014 <sup>(80)</sup>                   | 124<br>Denmark                                                |                                                                                                                                                                                                                                                                                                                                                                                            | Team climate<br><br>Inter-departmental<br>working<br>relationships<br><br>Increased cognitive<br>demands |                                           |
| Rogers et al., 1988<br><sup>(81)</sup> | Questionnaire-based study<br>1121<br>United States of America | Reporting forms not available<br><br>Event already documented<br><br>Did not get to it/got busy<br><br>Did not believe it was important<br><br>Forms were too much trouble<br><br>Minor or expected side effect<br><br>Did not like interacting with the<br>government<br><br>Liability concerns<br><br>Did not know how to report<br><br>Undetermined as ADE<br><br>Not primary physician |                                                                                                          | Age<br><br>Time in direct<br>patient care |

|                                       |                                                                         |                                                                                                                                                                                                                           |                                                                                                                                                                                                                                                               |                                        |
|---------------------------------------|-------------------------------------------------------------------------|---------------------------------------------------------------------------------------------------------------------------------------------------------------------------------------------------------------------------|---------------------------------------------------------------------------------------------------------------------------------------------------------------------------------------------------------------------------------------------------------------|----------------------------------------|
| Rowin et al., 2008 <sup>(82)</sup>    | Descriptive study<br>Sample size not stated<br>United States of America |                                                                                                                                                                                                                           | <p>More likely to report no harm (nurses)</p> <p>More likely to report permanent harm, near death, death and unsafe environment (doctors)</p> <p>Type of incident: falls and medication (nurse)</p> <p>Type of incident: adverse clinical event (doctors)</p> | <p>Temporary harm</p> <p>Near miss</p> |
| Sanghera et al., 2007 <sup>(83)</sup> | Semi-structured interviews<br>13<br>United Kingdom                      | <p>Not being aware that an error had occurred</p> <p>Detailed paperwork</p> <p>Time constraints</p> <p>Not understanding incident reporting process</p> <p>No benefit (perception that nothing is done with the data)</p> |                                                                                                                                                                                                                                                               |                                        |

|                                         |                                                              |                                                                                                                                                                                                                                                           |                                                                                                        |                                                                             |
|-----------------------------------------|--------------------------------------------------------------|-----------------------------------------------------------------------------------------------------------------------------------------------------------------------------------------------------------------------------------------------------------|--------------------------------------------------------------------------------------------------------|-----------------------------------------------------------------------------|
|                                         |                                                              | <p>No encouragement by management</p> <p>Fear of loss of professional registration</p> <p>Fear of being in trouble</p> <p>Fear of looking incompetent</p> <p>Feeling upset</p> <p>Fear will be blamed</p> <p>Not wanting to report colleagues' errors</p> |                                                                                                        |                                                                             |
| Sarvadikar et al., 2010 <sup>(84)</sup> | Questionnaire-based study<br>56<br>United Kingdom            |                                                                                                                                                                                                                                                           | Doctors more likely to report errors with worsening patient outcome                                    | Nurses and pharmacists likely to report error regardless of patient outcome |
| Schectman et al., 2006 <sup>(85)</sup>  | Questionnaire-based study<br>120<br>United States of America | <p>Unsure of reporting mechanism</p> <p>No actual harm came to the patient</p> <p>Reporting too difficult and time consuming</p> <p>Unsure of what is considered AE/NM</p>                                                                                | <p>Allow electronic reporting of adverse events and near misses</p> <p>Clarify reporting mechanism</p> |                                                                             |



|                                           |                                                              |                                                                                                                                                                                                                                                                                                                                                                                                                           |                                                                                                                                                                                                                                                                                                                          |  |
|-------------------------------------------|--------------------------------------------------------------|---------------------------------------------------------------------------------------------------------------------------------------------------------------------------------------------------------------------------------------------------------------------------------------------------------------------------------------------------------------------------------------------------------------------------|--------------------------------------------------------------------------------------------------------------------------------------------------------------------------------------------------------------------------------------------------------------------------------------------------------------------------|--|
|                                           |                                                              | <p>Inadequate MD participation in scheme</p> <p>Concern about consequences of reporting others' error</p> <p>Reporting makes no difference (nothing will change)</p> <p>Concern about being blamed or judged less competent</p> <p>Weaknesses in the reporting system</p> <p>Professional behaviours</p> <p>Fear of retribution</p> <p>Lack of feedback and the perception that change would not result from reports.</p> | <p>Clarify what constitutes an AE/NM</p> <p>Allow anonymous reporting</p> <p>Increase physician involvement in QI</p> <p>Provide feedback on QI projects arising from reports</p> <p>Provide individual feedback following report</p> <p>Provide summary feedback on a regular basis</p> <p>Make reporting mandatory</p> |  |
| Schulmeister et al., 1999 <sup>(86)</sup> | Questionnaire-based study<br>160<br>United States of America | <p>Minor error</p> <p>Fear of disciplinary action</p>                                                                                                                                                                                                                                                                                                                                                                     |                                                                                                                                                                                                                                                                                                                          |  |
| Sharma et al., 2008 <sup>(87)</sup>       | Questionnaire-based study<br>81<br>United Kingdom            | <p>Does not achieve anything</p> <p>Not in physicians culture</p>                                                                                                                                                                                                                                                                                                                                                         | <p>Anonymous system</p> <p>Easily accessible</p>                                                                                                                                                                                                                                                                         |  |

|                                               |                                                     |                                                                                                                                                                                                                                                                                                                         |                                                     |  |
|-----------------------------------------------|-----------------------------------------------------|-------------------------------------------------------------------------------------------------------------------------------------------------------------------------------------------------------------------------------------------------------------------------------------------------------------------------|-----------------------------------------------------|--|
|                                               |                                                     | <p>Do not wish to incriminate others</p> <p>Do not know how to access forms</p> <p>Not bothered</p> <p>Do not wish to ask nurse staff</p> <p>Lack of time</p> <p>Do not know which incidents need to be reported</p> <p>Lack of anonymity</p> <p>Not in habit of considering it</p> <p>Discouraged by senior nurses</p> | <p>forms</p> <p>Forms not held by nursing staff</p> |  |
| <p>Soberberg et al., 2009 <sup>(88)</sup></p> | <p>Questionnaire-based study<br/>317<br/>Sweden</p> | <p>I did not have enough time</p> <p>I am concerned about possible consequences</p> <p>Someone else did it</p> <p>It is too complicated</p> <p>No one else files incident reports</p> <p>It would not make any difference</p>                                                                                           |                                                     |  |

|                                          |                                                              |                                                                                                                                                                                                                                                                                                                                                                                                                                                                                                                               |  |  |
|------------------------------------------|--------------------------------------------------------------|-------------------------------------------------------------------------------------------------------------------------------------------------------------------------------------------------------------------------------------------------------------------------------------------------------------------------------------------------------------------------------------------------------------------------------------------------------------------------------------------------------------------------------|--|--|
|                                          |                                                              | Insufficient routines for reporting                                                                                                                                                                                                                                                                                                                                                                                                                                                                                           |  |  |
| Soleimani., 2006<br>(89)                 | Questionnaire-based study<br>128<br>New Zealand              | Threat of public outcry<br><br>Professional<br>consequences/discipline<br><br>Embarrassment in front of<br>colleagues                                                                                                                                                                                                                                                                                                                                                                                                         |  |  |
| Stratton et al.,<br>2004 <sup>(90)</sup> | Questionnaire-based study<br>284<br>United States of America | No positive feedback is given for<br>passing medications correctly<br><br>Nurse administration focuses on the<br>person rather than looking at the<br>system<br><br>Too much emphasis is placed on<br>medication errors as a measure of<br>the quality of care<br><br>Responses by nursing administration<br>do not match the severity of the error<br><br>Individual/personal reasons<br>Nurses could be blamed if something<br>happened to the patient<br><br>Nurse believe other nurses will think<br>they are incompetent |  |  |

|                            |                                                    |                                                                                                                                                                                                                                                                               |                                                                                                                                                                                                                   |                                                                               |
|----------------------------|----------------------------------------------------|-------------------------------------------------------------------------------------------------------------------------------------------------------------------------------------------------------------------------------------------------------------------------------|-------------------------------------------------------------------------------------------------------------------------------------------------------------------------------------------------------------------|-------------------------------------------------------------------------------|
|                            |                                                    | <p>Nurses fear adverse consequences from reporting</p> <p>Patient might develop a negative attitude</p> <p>Nurses fear reprimand from physician</p> <p>Nurses fear losing their license</p> <p>Nurses want to avoid potential publicity of medication errors in the media</p> |                                                                                                                                                                                                                   |                                                                               |
| Sweis et al., 2000<br>(91) | Questionnaire-based study<br>280<br>United Kingdom | <p>Busy</p> <p>Legal liability</p> <p>Fear of breaching patient confidentiality</p>                                                                                                                                                                                           | <p>Serious ADR rather than trivial</p> <p>Rarely occurring ADR rather than common ADR</p> <p>Confidence in recognising an ADR</p> <p>ADR to an established drug rather than new drug</p> <p>Active support of</p> | <p>Training in reporting</p> <p>Gender</p> <p>Type of hospital</p> <p>Age</p> |

|  |  |  |                                                                                                                                                                                                                                                                                                                                                                                                                |  |
|--|--|--|----------------------------------------------------------------------------------------------------------------------------------------------------------------------------------------------------------------------------------------------------------------------------------------------------------------------------------------------------------------------------------------------------------------|--|
|  |  |  | <p>medical/pharmacy staff</p> <p>Written hospital policy for pharmacist ADR reporting</p> <p>Training and ADR meeting</p> <p>Increasing seniority</p> <p>Allocation of time for ADR monitoring</p> <p>Publicity and promotion by hospital and CSM</p> <p>Better cooperation with clinicians</p> <p>Support and encouragement by the pharmacy department</p> <p>More ward rounds and direct patient contact</p> |  |
|--|--|--|----------------------------------------------------------------------------------------------------------------------------------------------------------------------------------------------------------------------------------------------------------------------------------------------------------------------------------------------------------------------------------------------------------------|--|

|                                     |                                                              |                                                                                                                                                                                                                                                                                                                                                                              |                                                                                                                                                                                                                                                                                                   |  |
|-------------------------------------|--------------------------------------------------------------|------------------------------------------------------------------------------------------------------------------------------------------------------------------------------------------------------------------------------------------------------------------------------------------------------------------------------------------------------------------------------|---------------------------------------------------------------------------------------------------------------------------------------------------------------------------------------------------------------------------------------------------------------------------------------------------|--|
|                                     |                                                              |                                                                                                                                                                                                                                                                                                                                                                              | <p>Simplify reporting system</p> <p>ADR reporting team</p> <p>Feedback</p>                                                                                                                                                                                                                        |  |
| Tariq et al., 2012 <sup>(92)</sup>  | Semi structured interviews<br>23<br>Australia                | Lack of time                                                                                                                                                                                                                                                                                                                                                                 |                                                                                                                                                                                                                                                                                                   |  |
| Taylor et al., 2004 <sup>(93)</sup> | Questionnaire-based study<br>140<br>United States of America | <p>Not important to report error that did not harm patient</p> <p>Reporting errors does not make any difference</p> <p>Unsure about what is considered medical</p> <p>Incident report form too complicated</p> <p>Concerned about being blamed or judged incompetent</p> <p>Concerned about implicating others</p> <p>Unsure whose responsibility it is to report errors</p> | <p>Make reporting of errors mandatory</p> <p>Different format for IR</p> <p>Use of electronic format for reports</p> <p>Reward for reporting medical errors</p> <p>Better education about what is considered a medical error that should be reported</p> <p>Evidence that reporting of errors</p> |  |

|                                           |                                                                             |                                                                                                   |                                                                                                                                                                               |  |
|-------------------------------------------|-----------------------------------------------------------------------------|---------------------------------------------------------------------------------------------------|-------------------------------------------------------------------------------------------------------------------------------------------------------------------------------|--|
|                                           |                                                                             |                                                                                                   | <p>led to system changes</p> <p>Feedback on regular basis and frequencies of reported errors</p> <p>Feedback regarding outcome of a specific error that has been reported</p> |  |
| Throckmorton et al., 2007 <sup>(94)</sup> | <p>Questionnaire-based study</p> <p>435</p> <p>United States of America</p> | Level of harm: no harm                                                                            | <p>Level of harm</p> <p>Working closely to the patient</p> <p>Higher scores on the Wakefield's scale</p> <p>Fewer years since initial license</p>                             |  |
| Tobaigy et al., 2013 <sup>(95)</sup>      | <p>Questionnaire-based study</p> <p>61</p> <p>Saudi Arabia</p>              | <p>Lack of awareness</p> <p>Workload/time constraints</p> <p>Unavailability of reporting form</p> | <p>Continuing education events</p> <p>An internet/web based reporting facility</p>                                                                                            |  |

|                                       |                                                           |                                                                                                                                                                                                                                                                      |                                                                                                                                                                   |                                                                                                                                                       |
|---------------------------------------|-----------------------------------------------------------|----------------------------------------------------------------------------------------------------------------------------------------------------------------------------------------------------------------------------------------------------------------------|-------------------------------------------------------------------------------------------------------------------------------------------------------------------|-------------------------------------------------------------------------------------------------------------------------------------------------------|
|                                       |                                                           | <p>Reporting system complexity</p> <p>Error too trivial</p> <p>Lack of anonymity</p> <p>Fear of blame</p> <p>Concerns over penalisation</p> <p>Difficulty in recognising errors</p> <p>Senior staff advised not to report</p> <p>Lack of feedback from authority</p> | <p>Training focused on error prevention</p> <p>Anonymity of reporting</p> <p>A non-punitive reporting culture</p> <p>Financial incentives linked to reporting</p> |                                                                                                                                                       |
| Turner et al., (2013) <sup>(96)</sup> | Semi-structured interviews<br>32<br>United Kingdom        | Value-not convinced that the reporting system would deliver improvements in clinical care                                                                                                                                                                            |                                                                                                                                                                   |                                                                                                                                                       |
| Uribe et al., 2002 <sup>(97)</sup>    | Questionnaire-based study<br>122 United States of America | <p>Time involved in documenting an error</p> <p>Extra work involved in reporting</p> <p>Hesitancy regarding 'telling' on somebody else</p> <p>Thinking that it is unnecessary to report error because it had no negative outcome</p>                                 |                                                                                                                                                                   | <p>Thinking that reporting has little contribution for improvement of quality care</p> <p>Not knowing the usefulness of the report</p> <p>Lack of</p> |



|  |  |                                                                     |  |                                                                                                                                                                                                                                                                                                                                                               |
|--|--|---------------------------------------------------------------------|--|---------------------------------------------------------------------------------------------------------------------------------------------------------------------------------------------------------------------------------------------------------------------------------------------------------------------------------------------------------------|
|  |  | <p>Not being able to report anonymously</p> <p>Fear of lawsuits</p> |  | <p>knowledge of what should be reported</p> <p>Lack of recognition that a medical error has occurred</p> <p>Fear of being blamed</p> <p>Fear of disciplinary action/ losing job</p> <p>Lack of information in how to report</p> <p>Lack of interest or motivation for reporting</p> <p>Forms or computer locations not available to report medical errors</p> |
|--|--|---------------------------------------------------------------------|--|---------------------------------------------------------------------------------------------------------------------------------------------------------------------------------------------------------------------------------------------------------------------------------------------------------------------------------------------------------------|

|                                      |                                          |                                                                                                                                                                                                                                                                                                                                                                                                           |                                                                                                                                                                                                                                                          |                                                    |
|--------------------------------------|------------------------------------------|-----------------------------------------------------------------------------------------------------------------------------------------------------------------------------------------------------------------------------------------------------------------------------------------------------------------------------------------------------------------------------------------------------------|----------------------------------------------------------------------------------------------------------------------------------------------------------------------------------------------------------------------------------------------------------|----------------------------------------------------|
|                                      |                                          |                                                                                                                                                                                                                                                                                                                                                                                                           |                                                                                                                                                                                                                                                          | Not knowing who is responsible for reporting error |
| Vessal et al., 2009 <sup>(98)</sup>  | Questionnaire-based study<br>110<br>Iran | <p>Uncertain association</p> <p>Too trivial to report</p> <p>Too well known to report</p> <p>Yellow card not available</p> <p>Not enough information from the patient</p> <p>Not enough time</p> <p>Unaware of the existence of a national ADR reporting system</p> <p>Too bureaucratic</p> <p>Did not know how to report</p> <p>Fear of legal liability</p> <p>Unaware of the need to report and ADR</p> | <p>The reaction is of a serious nature</p> <p>The reaction is unusual</p> <p>The reaction is to a new product</p> <p>Reaction not reported before for a particular drug</p> <p>Reaction is well recognised for a particular drug</p> <p>Any reaction</p> |                                                    |
| Vincent et al., 1998 <sup>(99)</sup> | Questionnaire-based study<br>198         | Unnecessary                                                                                                                                                                                                                                                                                                                                                                                               |                                                                                                                                                                                                                                                          | Unsupported colleagues                             |

|                             |                                                                       |                                                                                                                                |                                                                                           |                                                                                                                                                                                                                                                          |
|-----------------------------|-----------------------------------------------------------------------|--------------------------------------------------------------------------------------------------------------------------------|-------------------------------------------------------------------------------------------|----------------------------------------------------------------------------------------------------------------------------------------------------------------------------------------------------------------------------------------------------------|
|                             | United Kingdom                                                        | <p>Increased workload</p> <p>Blame</p> <p>Worry litigation</p> <p>Busy/forgot</p>                                              |                                                                                           | <p>Not knowing which incidents to report</p> <p>As long as staff learn from incident it is unnecessary to discuss/report</p> <p>Fear disciplinary</p> <p>Not wanting incident to be discussed</p> <p>Who's responsibility</p> <p>Little contribution</p> |
| Vogus et al., 2007<br>(100) | <p>Questionnaire-based study 1033</p> <p>United States of America</p> | <p>Safety organising</p> <p>Unit type (emergency)</p> <p>Safety organising and trust</p> <p>Safety organising and pathways</p> | <p>Trust in managers</p> <p>RN experience</p> <p>Unit type (IC)</p> <p>Number of beds</p> | <p>Care pathways</p> <p>% of RNs with BSN</p> <p>Unit type (surgery)</p>                                                                                                                                                                                 |

|                              |                                                               |                                                                                                                                                                                                                                                                                                                                                                              |                                                                                                                                                                                                                       |                                          |
|------------------------------|---------------------------------------------------------------|------------------------------------------------------------------------------------------------------------------------------------------------------------------------------------------------------------------------------------------------------------------------------------------------------------------------------------------------------------------------------|-----------------------------------------------------------------------------------------------------------------------------------------------------------------------------------------------------------------------|------------------------------------------|
|                              |                                                               | Patient-to-RN ratio                                                                                                                                                                                                                                                                                                                                                          |                                                                                                                                                                                                                       |                                          |
| Walji et al., 2011<br>(101)  | Semi- structured interviews<br>12<br>Canada                   | <p>Lack of knowledge about natural health products</p> <p>Lack of time/priorities</p> <p>Complexity of reporting process</p>                                                                                                                                                                                                                                                 | Pharmacists who saw themselves as 'knowledge generators' rather than just 'knowledge users' were more likely to report and less likely to allow workplace challenges to prevent their taking an extra step            |                                          |
| Walker et al., 1998<br>(102) | Focus groups and questionnaire-based study<br>43<br>Australia | <p>Minor incidents (documentation and minor variation from the prescription)</p> <p>Negative past experience of reporting</p> <p>Fear of getting into trouble</p> <p>Fear they will somehow stand out from the crowd in the eyes of those in authority</p> <p>Feelings of discomfort or uncertainty about being required to report an incident that involved a colleague</p> | <p>More likely to report an incident if patient safety compromised</p> <p>Capacity to feedback and improve the situation</p> <p>Reporting might help raise people's awareness of problems that could be occurring</p> | Fear of possible punishment senior staff |

|  |  |                                                                                                                                                                                                                                                                                                                                                                                                                                                                                                                                                                                                                                                                                                                                                                                                    |                                                                                                                                                                                                                                        |  |
|--|--|----------------------------------------------------------------------------------------------------------------------------------------------------------------------------------------------------------------------------------------------------------------------------------------------------------------------------------------------------------------------------------------------------------------------------------------------------------------------------------------------------------------------------------------------------------------------------------------------------------------------------------------------------------------------------------------------------------------------------------------------------------------------------------------------------|----------------------------------------------------------------------------------------------------------------------------------------------------------------------------------------------------------------------------------------|--|
|  |  | <p>This is more difficult if the colleague is a more experienced nurse</p> <p>Others expressed with view that they wouldn't report a friend, perhaps perceiving that the friend would be in trouble if the incident was reported</p> <p>Did not always want to admit their mistake</p> <p>Might not even realise that an error had occurred</p> <p>Incident might be highly incriminating</p> <p>If the patient actually came to harm as a result of the error</p> <p>If the departure from the prescribed therapy seemed reasonable</p> <p>If the problem could be sorted out</p> <p>Concern about the time taken to fill in the incident report form</p> <p>Inadequate understanding of what constituted an error</p> <p>A lack of feedback on the number of medication errors was a problem</p> | <p>Wrong drug</p> <p>Wrong route</p> <p>Wrong person</p> <p>Wrong dose</p> <p>Harm to the patient</p> <p>A desire to target an individual or professional group to improve practice</p> <p>Legal obligation of the nurse to report</p> |  |
|--|--|----------------------------------------------------------------------------------------------------------------------------------------------------------------------------------------------------------------------------------------------------------------------------------------------------------------------------------------------------------------------------------------------------------------------------------------------------------------------------------------------------------------------------------------------------------------------------------------------------------------------------------------------------------------------------------------------------------------------------------------------------------------------------------------------------|----------------------------------------------------------------------------------------------------------------------------------------------------------------------------------------------------------------------------------------|--|

|                               |                                                     |                                                                                                                                                                                                                                                                                             |  |  |
|-------------------------------|-----------------------------------------------------|---------------------------------------------------------------------------------------------------------------------------------------------------------------------------------------------------------------------------------------------------------------------------------------------|--|--|
|                               |                                                     | Perceived inaction on reported errors incidents                                                                                                                                                                                                                                             |  |  |
| Waring, 2004 <sup>(103)</sup> | Semi- structured interviews<br>37<br>United Kingdom | <p>Acute medicine and rehab: IR system was regarded as nurse led, dealing with ward issues and the work of non-medical groups</p> <p>Anaesthesia: Physicians remained sceptical about the hospital wide reporting system and were generally disinclined to participate in this approach</p> |  |  |
| Waring, 2005 <sup>(104)</sup> | Semi-structured interviews<br>28<br>United Kingdom  | <p>Fear of blame</p> <p>Blame culture</p> <p>Peer of punishment</p> <p>Fear of blame from public</p> <p>Fear of litigation</p> <p>Fear of professional competence being questioned</p> <p>Fear of poor references</p> <p>Reprimands from a senior colleague</p>                             |  |  |

|                                |                                                              |                                                                                                                                                                                                                                                                                                              |                                                                                                                                                                                                     |                    |
|--------------------------------|--------------------------------------------------------------|--------------------------------------------------------------------------------------------------------------------------------------------------------------------------------------------------------------------------------------------------------------------------------------------------------------|-----------------------------------------------------------------------------------------------------------------------------------------------------------------------------------------------------|--------------------|
|                                |                                                              | Fear of use of reports-could be used at a later date in the event in medico-legal disputes                                                                                                                                                                                                                   |                                                                                                                                                                                                     |                    |
| Waters et al., 2012<br>(105)   | Focus groups<br>16<br>Canada                                 | Time<br><br>Fatigue<br><br>High workload<br><br>Relevance of reporting form<br><br>Complexity of reporting-gathering many pieces of information.<br><br>Unit culture<br><br>Fear of blame<br><br>Close knit team<br><br>Other methods of reporting-verbal reporting and team debrief<br><br>Lack of feedback | Previous experience of litigation<br><br>Protection against future litigation<br><br>Professional responsibility<br><br>IR perceived as learning opportunity<br><br>Desire for practice improvement | Risk of litigation |
| Weissman et al., 2005<br>(106) | Questionnaire-based study<br>203<br>United States of America | Mandatory<br><br>Non-confidential system<br><br>State run                                                                                                                                                                                                                                                    | Serious harm                                                                                                                                                                                        |                    |

|                                             |                                                    |                                                                                                                                                                                                                                                                 |                                                                                                                                                                                           |  |
|---------------------------------------------|----------------------------------------------------|-----------------------------------------------------------------------------------------------------------------------------------------------------------------------------------------------------------------------------------------------------------------|-------------------------------------------------------------------------------------------------------------------------------------------------------------------------------------------|--|
|                                             |                                                    | Less harm                                                                                                                                                                                                                                                       |                                                                                                                                                                                           |  |
| Williams et al.,<br>2013 <sup>(107)</sup>   | Focus groups<br>17<br>United Kingdom               | Severity (more likely to report if serious harm)                                                                                                                                                                                                                | Simpler reporting system<br><br>Targeted report<br><br>Feedback<br><br>Drug-specific error reporting forms<br><br>Electronic forms/systems (easier than paper)<br><br>Anonymous reporting |  |
| Winchester et al.,<br>2012 <sup>(108)</sup> | Questionnaire-based study<br>120<br>United Kingdom | Concerned about confidentiality<br><br>Did not know the procedure for reporting<br><br>Did not think anything could be done<br><br>Did not feel incident was important enough to report<br><br>Believed source to be low risk<br><br>Reporting was inconvenient | Education<br><br>Adverts/posters<br><br>Training<br><br>Compulsory reporting<br><br>Simple reporting system<br><br>An electronic                                                          |  |



|                            |                                                 |                                                                                                                                                                                                                                                                                                                                                                                                                                                                                                                                                                                                                                |                                                                                                                                                                                                                                                                                                                                    |  |
|----------------------------|-------------------------------------------------|--------------------------------------------------------------------------------------------------------------------------------------------------------------------------------------------------------------------------------------------------------------------------------------------------------------------------------------------------------------------------------------------------------------------------------------------------------------------------------------------------------------------------------------------------------------------------------------------------------------------------------|------------------------------------------------------------------------------------------------------------------------------------------------------------------------------------------------------------------------------------------------------------------------------------------------------------------------------------|--|
|                            |                                                 |                                                                                                                                                                                                                                                                                                                                                                                                                                                                                                                                                                                                                                | reporting system                                                                                                                                                                                                                                                                                                                   |  |
| Yong et al., 2003<br>(109) | Questionnaire-based study<br>136<br>New Zealand | Time constraints<br>Laziness and forgetfulness<br>Dislike form filling<br>A lot of work for little practical benefit<br>Forms too complicated<br>Do not believe the system is working<br>Many incidents not worth reporting<br>Many other tools exist for correcting errors and improving standards<br>Dislike the published interpretation of results with diagnostic views by some anaesthetists<br>Qualitative result not acceptable<br>Feel that the main benefit of IR is local analysis and that very rare events distilled by multi-site monitoring are less important<br>Difficulty defining what constitutes incident | Total anonymity and confidentiality<br>Protection against punitive action<br>Simplify forms and bring up to date<br>Easy access to forms<br>Electronic data entry<br>Incorporating IR form filling at regular M&M meetings<br>Mandatory<br>Local analysis rather than Australasian wide<br>More aggressive follow up and reviewing |  |

|                             |                                               |                                                                                                                                                                                                                                                                                                                                          |                                                                                                                                          |                                                                                                                    |
|-----------------------------|-----------------------------------------------|------------------------------------------------------------------------------------------------------------------------------------------------------------------------------------------------------------------------------------------------------------------------------------------------------------------------------------------|------------------------------------------------------------------------------------------------------------------------------------------|--------------------------------------------------------------------------------------------------------------------|
|                             |                                               | <p>Inadequate feedback</p> <p>Medico-legal implications</p> <p>Forms not available/hard to locate</p> <p>Lack of appropriate culture within department</p> <p>Not accepted as part of private practice culture</p> <p>Use of local IR system, hospital based audit</p> <p>Incidents are discussed at department level confidentially</p> | <p>Publication of problems</p> <p>Aims and purpose should be clarified explicitly</p> <p>Select a few incidents to monitor frequency</p> |                                                                                                                    |
| Zwart et al., 2011<br>(110) | Prospective cohort study<br>66<br>Netherlands |                                                                                                                                                                                                                                                                                                                                          | Expertise                                                                                                                                | <p>Communicator</p> <p>Collaborator</p> <p>Manager</p> <p>Health advocate</p> <p>Scientist</p> <p>Professional</p> |

Adverse Drug Event (ADE); Adverse Drug Reaction (ADR); Adverse Event (AE); Australia and New Zealand College of Anesthetists (ANZCA); Bachelor of Science in Nursing (BSN); Critical Incident Reporting Service (CIRS); Drug related problems (DRP); Incident Reporting (IR); Iowa Department of Inspections Appeals (IDIA); Incident Information Management System (IIMS); Intensive Care (IC); Medication Administration Error (MAE); Medication and Healthcare Products Regulatory Agency (MHRA); Medical Doctor (MD); Morbidity and Mortality (M&M); Near Miss (NM); Patient Safety Culture (PSC); Quality Improvement (QI); Register Nurse (RN)

**eTable 2: Frequency of factors influencing engagement in incident reporting**

|                                                 |                                               | Impact on Reporting Engagement                                                                                                                                                                                                                                                                                                                                                                                                                                                                                                                                                                                                                                                                                                                                                                                                                                                                                                                                                                                                                                                                                                                                                                                                                                                                                                                                                                                                                                                                                                                                                                                                                                                                                                                                                                                                                                                                                                                                                                                                                                                                                                                                                                                                                                                                                                                                                                                                                                                                                                                                                                                                                                                                                                                                                                                                                                                                                                                                                                                                                                                                                                                                                                                                                                                                                                                                                                                                                                                                                                                                                                                                                                                                                                                                                                                                                                                                                                                                                                                                                                                                                                                                                                                                                                                                                                                                                                                                                                                                                                                                                                                                                                                                                                                                                                                                                                                                                                        |                                                                                                                                                                                                                                                                                                                                                                                                                                                                                                                                                                                                                                                                                                                                                                                                                                                                                                                                                                                                                                                                                                                                                                                                                                                                                                                                                                                                                                                                                                                                                                                                                                                                                                                                                                                                                                                                                                                                                                                                                                                                                                                                                                                                                                                                                                                                                                                                                                                                                                                                                                                                                                                                                                                                                                                                                                                                                                                                                                                                                                                                                                                                                                                                                                                                                                                                                                                                                                                                                                                                                                                                                                                                                                                                                                                                                                                                                                                                                                                                                                                                                                                                                                                                                                                                                                                                                                                                                                                                                                                                                                                                                                                                                                                                                                                                                                                                                  |                                                           |
|-------------------------------------------------|-----------------------------------------------|---------------------------------------------------------------------------------------------------------------------------------------------------------------------------------------------------------------------------------------------------------------------------------------------------------------------------------------------------------------------------------------------------------------------------------------------------------------------------------------------------------------------------------------------------------------------------------------------------------------------------------------------------------------------------------------------------------------------------------------------------------------------------------------------------------------------------------------------------------------------------------------------------------------------------------------------------------------------------------------------------------------------------------------------------------------------------------------------------------------------------------------------------------------------------------------------------------------------------------------------------------------------------------------------------------------------------------------------------------------------------------------------------------------------------------------------------------------------------------------------------------------------------------------------------------------------------------------------------------------------------------------------------------------------------------------------------------------------------------------------------------------------------------------------------------------------------------------------------------------------------------------------------------------------------------------------------------------------------------------------------------------------------------------------------------------------------------------------------------------------------------------------------------------------------------------------------------------------------------------------------------------------------------------------------------------------------------------------------------------------------------------------------------------------------------------------------------------------------------------------------------------------------------------------------------------------------------------------------------------------------------------------------------------------------------------------------------------------------------------------------------------------------------------------------------------------------------------------------------------------------------------------------------------------------------------------------------------------------------------------------------------------------------------------------------------------------------------------------------------------------------------------------------------------------------------------------------------------------------------------------------------------------------------------------------------------------------------------------------------------------------------------------------------------------------------------------------------------------------------------------------------------------------------------------------------------------------------------------------------------------------------------------------------------------------------------------------------------------------------------------------------------------------------------------------------------------------------------------------------------------------------------------------------------------------------------------------------------------------------------------------------------------------------------------------------------------------------------------------------------------------------------------------------------------------------------------------------------------------------------------------------------------------------------------------------------------------------------------------------------------------------------------------------------------------------------------------------------------------------------------------------------------------------------------------------------------------------------------------------------------------------------------------------------------------------------------------------------------------------------------------------------------------------------------------------------------------------------------------------------------------------------------------------------------------------|----------------------------------------------------------------------------------------------------------------------------------------------------------------------------------------------------------------------------------------------------------------------------------------------------------------------------------------------------------------------------------------------------------------------------------------------------------------------------------------------------------------------------------------------------------------------------------------------------------------------------------------------------------------------------------------------------------------------------------------------------------------------------------------------------------------------------------------------------------------------------------------------------------------------------------------------------------------------------------------------------------------------------------------------------------------------------------------------------------------------------------------------------------------------------------------------------------------------------------------------------------------------------------------------------------------------------------------------------------------------------------------------------------------------------------------------------------------------------------------------------------------------------------------------------------------------------------------------------------------------------------------------------------------------------------------------------------------------------------------------------------------------------------------------------------------------------------------------------------------------------------------------------------------------------------------------------------------------------------------------------------------------------------------------------------------------------------------------------------------------------------------------------------------------------------------------------------------------------------------------------------------------------------------------------------------------------------------------------------------------------------------------------------------------------------------------------------------------------------------------------------------------------------------------------------------------------------------------------------------------------------------------------------------------------------------------------------------------------------------------------------------------------------------------------------------------------------------------------------------------------------------------------------------------------------------------------------------------------------------------------------------------------------------------------------------------------------------------------------------------------------------------------------------------------------------------------------------------------------------------------------------------------------------------------------------------------------------------------------------------------------------------------------------------------------------------------------------------------------------------------------------------------------------------------------------------------------------------------------------------------------------------------------------------------------------------------------------------------------------------------------------------------------------------------------------------------------------------------------------------------------------------------------------------------------------------------------------------------------------------------------------------------------------------------------------------------------------------------------------------------------------------------------------------------------------------------------------------------------------------------------------------------------------------------------------------------------------------------------------------------------------------------------------------------------------------------------------------------------------------------------------------------------------------------------------------------------------------------------------------------------------------------------------------------------------------------------------------------------------------------------------------------------------------------------------------------------------------------------------------------------|-----------------------------------------------------------|
| Factor                                          |                                               | Barrier<br>Frequency<br>Count (%)                                                                                                                                                                                                                                                                                                                                                                                                                                                                                                                                                                                                                                                                                                                                                                                                                                                                                                                                                                                                                                                                                                                                                                                                                                                                                                                                                                                                                                                                                                                                                                                                                                                                                                                                                                                                                                                                                                                                                                                                                                                                                                                                                                                                                                                                                                                                                                                                                                                                                                                                                                                                                                                                                                                                                                                                                                                                                                                                                                                                                                                                                                                                                                                                                                                                                                                                                                                                                                                                                                                                                                                                                                                                                                                                                                                                                                                                                                                                                                                                                                                                                                                                                                                                                                                                                                                                                                                                                                                                                                                                                                                                                                                                                                                                                                                                                                                                                                     | Facilitator<br>Frequency<br>Count (%)                                                                                                                                                                                                                                                                                                                                                                                                                                                                                                                                                                                                                                                                                                                                                                                                                                                                                                                                                                                                                                                                                                                                                                                                                                                                                                                                                                                                                                                                                                                                                                                                                                                                                                                                                                                                                                                                                                                                                                                                                                                                                                                                                                                                                                                                                                                                                                                                                                                                                                                                                                                                                                                                                                                                                                                                                                                                                                                                                                                                                                                                                                                                                                                                                                                                                                                                                                                                                                                                                                                                                                                                                                                                                                                                                                                                                                                                                                                                                                                                                                                                                                                                                                                                                                                                                                                                                                                                                                                                                                                                                                                                                                                                                                                                                                                                                                            | Negative<br>Case<br>(no impact)<br>Frequency<br>Count (%) |
| <i>Fear of<br/>Adverse<br/>Consequences</i>     | Adverse consequences                          | 51 (31.68%) <sup>(1, 2, 4, 11, 14, 17, 18, 20, 21, 23-25, 30, 35, 36, 43, 46, 47, 49, 51, 52, 55, 56, 62, 65, 69-71, 77, 79, 83, 85, 86, 88, 90, 95, 102, 104)</sup>                                                                                                                                                                                                                                                                                                                                                                                                                                                                                                                                                                                                                                                                                                                                                                                                                                                                                                                                                                                                                                                                                                                                                                                                                                                                                                                                                                                                                                                                                                                                                                                                                                                                                                                                                                                                                                                                                                                                                                                                                                                                                                                                                                                                                                                                                                                                                                                                                                                                                                                                                                                                                                                                                                                                                                                                                                                                                                                                                                                                                                                                                                                                                                                                                                                                                                                                                                                                                                                                                                                                                                                                                                                                                                                                                                                                                                                                                                                                                                                                                                                                                                                                                                                                                                                                                                                                                                                                                                                                                                                                                                                                                                                                                                                                                                  | -                                                                                                                                                                                                                                                                                                                                                                                                                                                                                                                                                                                                                                                                                                                                                                                                                                                                                                                                                                                                                                                                                                                                                                                                                                                                                                                                                                                                                                                                                                                                                                                                                                                                                                                                                                                                                                                                                                                                                                                                                                                                                                                                                                                                                                                                                                                                                                                                                                                                                                                                                                                                                                                                                                                                                                                                                                                                                                                                                                                                                                                                                                                                                                                                                                                                                                                                                                                                                                                                                                                                                                                                                                                                                                                                                                                                                                                                                                                                                                                                                                                                                                                                                                                                                                                                                                                                                                                                                                                                                                                                                                                                                                                                                                                                                                                                                                                                                | 3 (25.00%) <sup>(16, 99, 102)</sup>                       |
|                                                 | Litigation                                    | 30 (18.63%) <sup>(4, 9, 10, 12, 13, 28, 35, 36, 40, 44, 46-49, 55, 56, 64, 66, 67, 69, 72, 74, 81, 91, 97-99, 102, 104, 109)</sup>                                                                                                                                                                                                                                                                                                                                                                                                                                                                                                                                                                                                                                                                                                                                                                                                                                                                                                                                                                                                                                                                                                                                                                                                                                                                                                                                                                                                                                                                                                                                                                                                                                                                                                                                                                                                                                                                                                                                                                                                                                                                                                                                                                                                                                                                                                                                                                                                                                                                                                                                                                                                                                                                                                                                                                                                                                                                                                                                                                                                                                                                                                                                                                                                                                                                                                                                                                                                                                                                                                                                                                                                                                                                                                                                                                                                                                                                                                                                                                                                                                                                                                                                                                                                                                                                                                                                                                                                                                                                                                                                                                                                                                                                                                                                                                                                    | 8 (61.54%) <sup>(45, 47, 55, 56, 62, 66, 105)</sup>                                                                                                                                                                                                                                                                                                                                                                                                                                                                                                                                                                                                                                                                                                                                                                                                                                                                                                                                                                                                                                                                                                                                                                                                                                                                                                                                                                                                                                                                                                                                                                                                                                                                                                                                                                                                                                                                                                                                                                                                                                                                                                                                                                                                                                                                                                                                                                                                                                                                                                                                                                                                                                                                                                                                                                                                                                                                                                                                                                                                                                                                                                                                                                                                                                                                                                                                                                                                                                                                                                                                                                                                                                                                                                                                                                                                                                                                                                                                                                                                                                                                                                                                                                                                                                                                                                                                                                                                                                                                                                                                                                                                                                                                                                                                                                                                                              | 4 (33.33%) <sup>(13, 39, 97, 105)</sup>                   |
|                                                 | Blame                                         | 24 (14.91%) <sup>(3, 4, 17, 24, 30, 35, 36, 45, 46, 49, 52, 71, 78, 79, 83, 85, 90, 93, 95, 99, 104, 105)</sup>                                                                                                                                                                                                                                                                                                                                                                                                                                                                                                                                                                                                                                                                                                                                                                                                                                                                                                                                                                                                                                                                                                                                                                                                                                                                                                                                                                                                                                                                                                                                                                                                                                                                                                                                                                                                                                                                                                                                                                                                                                                                                                                                                                                                                                                                                                                                                                                                                                                                                                                                                                                                                                                                                                                                                                                                                                                                                                                                                                                                                                                                                                                                                                                                                                                                                                                                                                                                                                                                                                                                                                                                                                                                                                                                                                                                                                                                                                                                                                                                                                                                                                                                                                                                                                                                                                                                                                                                                                                                                                                                                                                                                                                                                                                                                                                                                       | 4 (30.77%) <sup>(47, 49, 55, 66)</sup>                                                                                                                                                                                                                                                                                                                                                                                                                                                                                                                                                                                                                                                                                                                                                                                                                                                                                                                                                                                                                                                                                                                                                                                                                                                                                                                                                                                                                                                                                                                                                                                                                                                                                                                                                                                                                                                                                                                                                                                                                                                                                                                                                                                                                                                                                                                                                                                                                                                                                                                                                                                                                                                                                                                                                                                                                                                                                                                                                                                                                                                                                                                                                                                                                                                                                                                                                                                                                                                                                                                                                                                                                                                                                                                                                                                                                                                                                                                                                                                                                                                                                                                                                                                                                                                                                                                                                                                                                                                                                                                                                                                                                                                                                                                                                                                                                                           | 1 (8.33%) <sup>(97)</sup>                                 |
|                                                 | Judgment                                      | 22 (13.66%) <sup>(2, 10, 12, 13, 17, 21, 24, 41, 46, 47, 70, 73, 79, 83, 89, 90, 104)</sup>                                                                                                                                                                                                                                                                                                                                                                                                                                                                                                                                                                                                                                                                                                                                                                                                                                                                                                                                                                                                                                                                                                                                                                                                                                                                                                                                                                                                                                                                                                                                                                                                                                                                                                                                                                                                                                                                                                                                                                                                                                                                                                                                                                                                                                                                                                                                                                                                                                                                                                                                                                                                                                                                                                                                                                                                                                                                                                                                                                                                                                                                                                                                                                                                                                                                                                                                                                                                                                                                                                                                                                                                                                                                                                                                                                                                                                                                                                                                                                                                                                                                                                                                                                                                                                                                                                                                                                                                                                                                                                                                                                                                                                                                                                                                                                                                                                           |                                                                                                                                                                                                                                                                                                                                                                                                                                                                                                                                                                                                                                                                                                                                                                                                                                                                                                                                                                                                                                                                                                                                                                                                                                                                                                                                                                                                                                                                                                                                                                                                                                                                                                                                                                                                                                                                                                                                                                                                                                                                                                                                                                                                                                                                                                                                                                                                                                                                                                                                                                                                                                                                                                                                                                                                                                                                                                                                                                                                                                                                                                                                                                                                                                                                                                                                                                                                                                                                                                                                                                                                                                                                                                                                                                                                                                                                                                                                                                                                                                                                                                                                                                                                                                                                                                                                                                                                                                                                                                                                                                                                                                                                                                                                                                                                                                                                                  | 1 (8.33%) <sup>(44)</sup>                                 |
|                                                 | Relationships                                 | 12 (7.45%) <sup>(1, 2, 20, 24, 55, 77, 85, 89, 90, 93, 97, 104)</sup>                                                                                                                                                                                                                                                                                                                                                                                                                                                                                                                                                                                                                                                                                                                                                                                                                                                                                                                                                                                                                                                                                                                                                                                                                                                                                                                                                                                                                                                                                                                                                                                                                                                                                                                                                                                                                                                                                                                                                                                                                                                                                                                                                                                                                                                                                                                                                                                                                                                                                                                                                                                                                                                                                                                                                                                                                                                                                                                                                                                                                                                                                                                                                                                                                                                                                                                                                                                                                                                                                                                                                                                                                                                                                                                                                                                                                                                                                                                                                                                                                                                                                                                                                                                                                                                                                                                                                                                                                                                                                                                                                                                                                                                                                                                                                                                                                                                                 | -                                                                                                                                                                                                                                                                                                                                                                                                                                                                                                                                                                                                                                                                                                                                                                                                                                                                                                                                                                                                                                                                                                                                                                                                                                                                                                                                                                                                                                                                                                                                                                                                                                                                                                                                                                                                                                                                                                                                                                                                                                                                                                                                                                                                                                                                                                                                                                                                                                                                                                                                                                                                                                                                                                                                                                                                                                                                                                                                                                                                                                                                                                                                                                                                                                                                                                                                                                                                                                                                                                                                                                                                                                                                                                                                                                                                                                                                                                                                                                                                                                                                                                                                                                                                                                                                                                                                                                                                                                                                                                                                                                                                                                                                                                                                                                                                                                                                                | -                                                         |
|                                                 | Impact on career                              | 10 (6.21%) <sup>(15, 24, 30, 55, 56, 72, 73, 83, 90, 104)</sup>                                                                                                                                                                                                                                                                                                                                                                                                                                                                                                                                                                                                                                                                                                                                                                                                                                                                                                                                                                                                                                                                                                                                                                                                                                                                                                                                                                                                                                                                                                                                                                                                                                                                                                                                                                                                                                                                                                                                                                                                                                                                                                                                                                                                                                                                                                                                                                                                                                                                                                                                                                                                                                                                                                                                                                                                                                                                                                                                                                                                                                                                                                                                                                                                                                                                                                                                                                                                                                                                                                                                                                                                                                                                                                                                                                                                                                                                                                                                                                                                                                                                                                                                                                                                                                                                                                                                                                                                                                                                                                                                                                                                                                                                                                                                                                                                                                                                       | -                                                                                                                                                                                                                                                                                                                                                                                                                                                                                                                                                                                                                                                                                                                                                                                                                                                                                                                                                                                                                                                                                                                                                                                                                                                                                                                                                                                                                                                                                                                                                                                                                                                                                                                                                                                                                                                                                                                                                                                                                                                                                                                                                                                                                                                                                                                                                                                                                                                                                                                                                                                                                                                                                                                                                                                                                                                                                                                                                                                                                                                                                                                                                                                                                                                                                                                                                                                                                                                                                                                                                                                                                                                                                                                                                                                                                                                                                                                                                                                                                                                                                                                                                                                                                                                                                                                                                                                                                                                                                                                                                                                                                                                                                                                                                                                                                                                                                | 1 (8.33%) <sup>(50)</sup>                                 |
|                                                 | Protection of self                            | 7 (4.35%) <sup>(10, 12, 13, 42, 68, 80)</sup>                                                                                                                                                                                                                                                                                                                                                                                                                                                                                                                                                                                                                                                                                                                                                                                                                                                                                                                                                                                                                                                                                                                                                                                                                                                                                                                                                                                                                                                                                                                                                                                                                                                                                                                                                                                                                                                                                                                                                                                                                                                                                                                                                                                                                                                                                                                                                                                                                                                                                                                                                                                                                                                                                                                                                                                                                                                                                                                                                                                                                                                                                                                                                                                                                                                                                                                                                                                                                                                                                                                                                                                                                                                                                                                                                                                                                                                                                                                                                                                                                                                                                                                                                                                                                                                                                                                                                                                                                                                                                                                                                                                                                                                                                                                                                                                                                                                                                         | -                                                                                                                                                                                                                                                                                                                                                                                                                                                                                                                                                                                                                                                                                                                                                                                                                                                                                                                                                                                                                                                                                                                                                                                                                                                                                                                                                                                                                                                                                                                                                                                                                                                                                                                                                                                                                                                                                                                                                                                                                                                                                                                                                                                                                                                                                                                                                                                                                                                                                                                                                                                                                                                                                                                                                                                                                                                                                                                                                                                                                                                                                                                                                                                                                                                                                                                                                                                                                                                                                                                                                                                                                                                                                                                                                                                                                                                                                                                                                                                                                                                                                                                                                                                                                                                                                                                                                                                                                                                                                                                                                                                                                                                                                                                                                                                                                                                                                | -                                                         |
|                                                 | Avoid discussion in meetings                  | 4 (2.48%) <sup>(35, 49, 67, 109)</sup>                                                                                                                                                                                                                                                                                                                                                                                                                                                                                                                                                                                                                                                                                                                                                                                                                                                                                                                                                                                                                                                                                                                                                                                                                                                                                                                                                                                                                                                                                                                                                                                                                                                                                                                                                                                                                                                                                                                                                                                                                                                                                                                                                                                                                                                                                                                                                                                                                                                                                                                                                                                                                                                                                                                                                                                                                                                                                                                                                                                                                                                                                                                                                                                                                                                                                                                                                                                                                                                                                                                                                                                                                                                                                                                                                                                                                                                                                                                                                                                                                                                                                                                                                                                                                                                                                                                                                                                                                                                                                                                                                                                                                                                                                                                                                                                                                                                                                                | -                                                                                                                                                                                                                                                                                                                                                                                                                                                                                                                                                                                                                                                                                                                                                                                                                                                                                                                                                                                                                                                                                                                                                                                                                                                                                                                                                                                                                                                                                                                                                                                                                                                                                                                                                                                                                                                                                                                                                                                                                                                                                                                                                                                                                                                                                                                                                                                                                                                                                                                                                                                                                                                                                                                                                                                                                                                                                                                                                                                                                                                                                                                                                                                                                                                                                                                                                                                                                                                                                                                                                                                                                                                                                                                                                                                                                                                                                                                                                                                                                                                                                                                                                                                                                                                                                                                                                                                                                                                                                                                                                                                                                                                                                                                                                                                                                                                                                | 1 (8.33%) <sup>(99)</sup>                                 |
|                                                 | Apprehension about sending inappropriate form | 1 (0.62%) <sup>(43)</sup>                                                                                                                                                                                                                                                                                                                                                                                                                                                                                                                                                                                                                                                                                                                                                                                                                                                                                                                                                                                                                                                                                                                                                                                                                                                                                                                                                                                                                                                                                                                                                                                                                                                                                                                                                                                                                                                                                                                                                                                                                                                                                                                                                                                                                                                                                                                                                                                                                                                                                                                                                                                                                                                                                                                                                                                                                                                                                                                                                                                                                                                                                                                                                                                                                                                                                                                                                                                                                                                                                                                                                                                                                                                                                                                                                                                                                                                                                                                                                                                                                                                                                                                                                                                                                                                                                                                                                                                                                                                                                                                                                                                                                                                                                                                                                                                                                                                                                                             | -                                                                                                                                                                                                                                                                                                                                                                                                                                                                                                                                                                                                                                                                                                                                                                                                                                                                                                                                                                                                                                                                                                                                                                                                                                                                                                                                                                                                                                                                                                                                                                                                                                                                                                                                                                                                                                                                                                                                                                                                                                                                                                                                                                                                                                                                                                                                                                                                                                                                                                                                                                                                                                                                                                                                                                                                                                                                                                                                                                                                                                                                                                                                                                                                                                                                                                                                                                                                                                                                                                                                                                                                                                                                                                                                                                                                                                                                                                                                                                                                                                                                                                                                                                                                                                                                                                                                                                                                                                                                                                                                                                                                                                                                                                                                                                                                                                                                                | -                                                         |
|                                                 | Non-punitive                                  | -                                                                                                                                                                                                                                                                                                                                                                                                                                                                                                                                                                                                                                                                                                                                                                                                                                                                                                                                                                                                                                                                                                                                                                                                                                                                                                                                                                                                                                                                                                                                                                                                                                                                                                                                                                                                                                                                                                                                                                                                                                                                                                                                                                                                                                                                                                                                                                                                                                                                                                                                                                                                                                                                                                                                                                                                                                                                                                                                                                                                                                                                                                                                                                                                                                                                                                                                                                                                                                                                                                                                                                                                                                                                                                                                                                                                                                                                                                                                                                                                                                                                                                                                                                                                                                                                                                                                                                                                                                                                                                                                                                                                                                                                                                                                                                                                                                                                                                                                     | 1 (7.69%) <sup>(109)</sup>                                                                                                                                                                                                                                                                                                                                                                                                                                                                                                                                                                                                                                                                                                                                                                                                                                                                                                                                                                                                                                                                                                                                                                                                                                                                                                                                                                                                                                                                                                                                                                                                                                                                                                                                                                                                                                                                                                                                                                                                                                                                                                                                                                                                                                                                                                                                                                                                                                                                                                                                                                                                                                                                                                                                                                                                                                                                                                                                                                                                                                                                                                                                                                                                                                                                                                                                                                                                                                                                                                                                                                                                                                                                                                                                                                                                                                                                                                                                                                                                                                                                                                                                                                                                                                                                                                                                                                                                                                                                                                                                                                                                                                                                                                                                                                                                                                                       | 1 (8.33%) <sup>(8)</sup>                                  |
|                                                 | <b>Total</b>                                  | <b>161 (100%)</b>                                                                                                                                                                                                                                                                                                                                                                                                                                                                                                                                                                                                                                                                                                                                                                                                                                                                                                                                                                                                                                                                                                                                                                                                                                                                                                                                                                                                                                                                                                                                                                                                                                                                                                                                                                                                                                                                                                                                                                                                                                                                                                                                                                                                                                                                                                                                                                                                                                                                                                                                                                                                                                                                                                                                                                                                                                                                                                                                                                                                                                                                                                                                                                                                                                                                                                                                                                                                                                                                                                                                                                                                                                                                                                                                                                                                                                                                                                                                                                                                                                                                                                                                                                                                                                                                                                                                                                                                                                                                                                                                                                                                                                                                                                                                                                                                                                                                                                                     | <b>13 (100%)</b>                                                                                                                                                                                                                                                                                                                                                                                                                                                                                                                                                                                                                                                                                                                                                                                                                                                                                                                                                                                                                                                                                                                                                                                                                                                                                                                                                                                                                                                                                                                                                                                                                                                                                                                                                                                                                                                                                                                                                                                                                                                                                                                                                                                                                                                                                                                                                                                                                                                                                                                                                                                                                                                                                                                                                                                                                                                                                                                                                                                                                                                                                                                                                                                                                                                                                                                                                                                                                                                                                                                                                                                                                                                                                                                                                                                                                                                                                                                                                                                                                                                                                                                                                                                                                                                                                                                                                                                                                                                                                                                                                                                                                                                                                                                                                                                                                                                                 | <b>12 (100%)</b>                                          |
| <i>Process and<br/>Systems of<br/>Reporting</i> | Time                                          | 29 (26.36%) <sup>(9, 10, 17, 22-24, 27, 35, 44, 47, 49, 55, 56, 64, 67, 69, 71, 72, 79, 83, 87, 88, 95, 97, 98, 102, 105)</sup>                                                                                                                                                                                                                                                                                                                                                                                                                                                                                                                                                                                                                                                                                                                                                                                                                                                                                                                                                                                                                                                                                                                                                                                                                                                                                                                                                                                                                                                                                                                                                                                                                                                                                                                                                                                                                                                                                                                                                                                                                                                                                                                                                                                                                                                                                                                                                                                                                                                                                                                                                                                                                                                                                                                                                                                                                                                                                                                                                                                                                                                                                                                                                                                                                                                                                                                                                                                                                                                                                                                                                                                                                                                                                                                                                                                                                                                                                                                                                                                                                                                                                                                                                                                                                                                                                                                                                                                                                                                                                                                                                                                                                                                                                                                                                                                                       | 5 (6.67%) <sup>(37, 39, 55, 66)</sup>                                                                                                                                                                                                                                                                                                                                                                                                                                                                                                                                                                                                                                                                                                                                                                                                                                                                                                                                                                                                                                                                                                                                                                                                                                                                                                                                                                                                                                                                                                                                                                                                                                                                                                                                                                                                                                                                                                                                                                                                                                                                                                                                                                                                                                                                                                                                                                                                                                                                                                                                                                                                                                                                                                                                                                                                                                                                                                                                                                                                                                                                                                                                                                                                                                                                                                                                                                                                                                                                                                                                                                                                                                                                                                                                                                                                                                                                                                                                                                                                                                                                                                                                                                                                                                                                                                                                                                                                                                                                                                                                                                                                                                                                                                                                                                                                                                            | -                                                         |
|                                                 | Complexity/simplification of reporting        | 28 (25.45%) <sup>(10, 27, 29, 35, 44, 46, 47, 50, 55, 56, 57, 58, 59, 60, 61, 62, 63, 64, 65, 66, 67, 68, 69, 70, 71, 72, 73, 74, 75, 76, 77, 78, 79, 80, 81, 82, 83, 84, 85, 86, 87, 88, 89, 90, 91, 92, 93, 94, 95, 96, 97, 98, 99, 100, 101, 102, 103, 104, 105, 106, 107, 108, 109, 110, 111, 112, 113, 114, 115, 116, 117, 118, 119, 120, 121, 122, 123, 124, 125, 126, 127, 128, 129, 130, 131, 132, 133, 134, 135, 136, 137, 138, 139, 140, 141, 142, 143, 144, 145, 146, 147, 148, 149, 150, 151, 152, 153, 154, 155, 156, 157, 158, 159, 160, 161, 162, 163, 164, 165, 166, 167, 168, 169, 170, 171, 172, 173, 174, 175, 176, 177, 178, 179, 180, 181, 182, 183, 184, 185, 186, 187, 188, 189, 190, 191, 192, 193, 194, 195, 196, 197, 198, 199, 200, 201, 202, 203, 204, 205, 206, 207, 208, 209, 210, 211, 212, 213, 214, 215, 216, 217, 218, 219, 220, 221, 222, 223, 224, 225, 226, 227, 228, 229, 230, 231, 232, 233, 234, 235, 236, 237, 238, 239, 240, 241, 242, 243, 244, 245, 246, 247, 248, 249, 250, 251, 252, 253, 254, 255, 256, 257, 258, 259, 260, 261, 262, 263, 264, 265, 266, 267, 268, 269, 270, 271, 272, 273, 274, 275, 276, 277, 278, 279, 280, 281, 282, 283, 284, 285, 286, 287, 288, 289, 290, 291, 292, 293, 294, 295, 296, 297, 298, 299, 300, 301, 302, 303, 304, 305, 306, 307, 308, 309, 310, 311, 312, 313, 314, 315, 316, 317, 318, 319, 320, 321, 322, 323, 324, 325, 326, 327, 328, 329, 330, 331, 332, 333, 334, 335, 336, 337, 338, 339, 340, 341, 342, 343, 344, 345, 346, 347, 348, 349, 350, 351, 352, 353, 354, 355, 356, 357, 358, 359, 360, 361, 362, 363, 364, 365, 366, 367, 368, 369, 370, 371, 372, 373, 374, 375, 376, 377, 378, 379, 380, 381, 382, 383, 384, 385, 386, 387, 388, 389, 390, 391, 392, 393, 394, 395, 396, 397, 398, 399, 400, 401, 402, 403, 404, 405, 406, 407, 408, 409, 410, 411, 412, 413, 414, 415, 416, 417, 418, 419, 420, 421, 422, 423, 424, 425, 426, 427, 428, 429, 430, 431, 432, 433, 434, 435, 436, 437, 438, 439, 440, 441, 442, 443, 444, 445, 446, 447, 448, 449, 450, 451, 452, 453, 454, 455, 456, 457, 458, 459, 460, 461, 462, 463, 464, 465, 466, 467, 468, 469, 470, 471, 472, 473, 474, 475, 476, 477, 478, 479, 480, 481, 482, 483, 484, 485, 486, 487, 488, 489, 490, 491, 492, 493, 494, 495, 496, 497, 498, 499, 500, 501, 502, 503, 504, 505, 506, 507, 508, 509, 510, 511, 512, 513, 514, 515, 516, 517, 518, 519, 520, 521, 522, 523, 524, 525, 526, 527, 528, 529, 530, 531, 532, 533, 534, 535, 536, 537, 538, 539, 540, 541, 542, 543, 544, 545, 546, 547, 548, 549, 550, 551, 552, 553, 554, 555, 556, 557, 558, 559, 560, 561, 562, 563, 564, 565, 566, 567, 568, 569, 570, 571, 572, 573, 574, 575, 576, 577, 578, 579, 580, 581, 582, 583, 584, 585, 586, 587, 588, 589, 590, 591, 592, 593, 594, 595, 596, 597, 598, 599, 600, 601, 602, 603, 604, 605, 606, 607, 608, 609, 610, 611, 612, 613, 614, 615, 616, 617, 618, 619, 620, 621, 622, 623, 624, 625, 626, 627, 628, 629, 630, 631, 632, 633, 634, 635, 636, 637, 638, 639, 640, 641, 642, 643, 644, 645, 646, 647, 648, 649, 650, 651, 652, 653, 654, 655, 656, 657, 658, 659, 660, 661, 662, 663, 664, 665, 666, 667, 668, 669, 670, 671, 672, 673, 674, 675, 676, 677, 678, 679, 680, 681, 682, 683, 684, 685, 686, 687, 688, 689, 690, 691, 692, 693, 694, 695, 696, 697, 698, 699, 700, 701, 702, 703, 704, 705, 706, 707, 708, 709, 710, 711, 712, 713, 714, 715, 716, 717, 718, 719, 720, 721, 722, 723, 724, 725, 726, 727, 728, 729, 730, 731, 732, 733, 734, 735, 736, 737, 738, 739, 740, 741, 742, 743, 744, 745, 746, 747, 748, 749, 750, 751, 752, 753, 754, 755, 756, 757, 758, 759, 760, 761, 762, 763, 764, 765, 766, 767, 768, 769, 770, 771, 772, 773, 774, 775, 776, 777, 778, 779, 780, 781, 782, 783, 784, 785, 786, 787, 788, 789, 790, 791, 792, 793, 794, 795, 796, 797, 798, 799, 800, 801, 802, 803, 804, 805, 806, 807, 808, 809, 810, 811, 812, 813, 814, 815, 816, 817, 818, 819, 820, 821, 822, 823, 824, 825, 826, 827, 828, 829, 830, 831, 832, 833, 834, 835, 836, 837, 838, 839, 840, 841, 842, 843, 844, 845, 846, 847, 848, 849, 850, 851, 852, 853, 854, 855, 856, 857, 858, 859, 860, 861, 862, 863, 864, 865, 866, 867, 868, 869, 870, 871, 872, 873, 874, 875, 876, 877, 878, 879, 880, 881, 882, 883, 884, 885, 886, 887, 888, 889, 890, 891, 892, 893, 894, 895, 896, 897, 898, 899, 900, 901, 902, 903, 904, 905, 906, 907, 908, 909, 910, 911, 912, 913, 914, 915, 916, 917, 918, 919, 920, 921, 922, 923, 924, 925, 926, 927, 928, 929, 930, 931, 932, 933, 934, 935, 936, 937, 938, 939, 940, 941, 942, 943, 944, 945, 946, 947, 948, 949, 950, 951, 952, 953, 954, 955, 956, 957, 958, 959, 960, 961, 962, 963, 964, 965, 966, 967, 968, 969, 970, 971, 972, 973, 974, 975, 976, 977, 978, 979, 980, 981, 982, 983, 984, 985, 986, 987, 988, 989, 990, 991, 992, 993, 994, 995, 996, 997, 998, 999, 1000)</sup> | 15 (20.00%) <sup>(9, 11, 27, 44, 52, 55, 66, 67, 68, 69, 70, 71, 72, 73, 74, 75, 76, 77, 78, 79, 80, 81, 82, 83, 84, 85, 86, 87, 88, 89, 90, 91, 92, 93, 94, 95, 96, 97, 98, 99, 100, 101, 102, 103, 104, 105, 106, 107, 108, 109, 110, 111, 112, 113, 114, 115, 116, 117, 118, 119, 120, 121, 122, 123, 124, 125, 126, 127, 128, 129, 130, 131, 132, 133, 134, 135, 136, 137, 138, 139, 140, 141, 142, 143, 144, 145, 146, 147, 148, 149, 150, 151, 152, 153, 154, 155, 156, 157, 158, 159, 160, 161, 162, 163, 164, 165, 166, 167, 168, 169, 170, 171, 172, 173, 174, 175, 176, 177, 178, 179, 180, 181, 182, 183, 184, 185, 186, 187, 188, 189, 190, 191, 192, 193, 194, 195, 196, 197, 198, 199, 200, 201, 202, 203, 204, 205, 206, 207, 208, 209, 210, 211, 212, 213, 214, 215, 216, 217, 218, 219, 220, 221, 222, 223, 224, 225, 226, 227, 228, 229, 230, 231, 232, 233, 234, 235, 236, 237, 238, 239, 240, 241, 242, 243, 244, 245, 246, 247, 248, 249, 250, 251, 252, 253, 254, 255, 256, 257, 258, 259, 260, 261, 262, 263, 264, 265, 266, 267, 268, 269, 270, 271, 272, 273, 274, 275, 276, 277, 278, 279, 280, 281, 282, 283, 284, 285, 286, 287, 288, 289, 290, 291, 292, 293, 294, 295, 296, 297, 298, 299, 300, 301, 302, 303, 304, 305, 306, 307, 308, 309, 310, 311, 312, 313, 314, 315, 316, 317, 318, 319, 320, 321, 322, 323, 324, 325, 326, 327, 328, 329, 330, 331, 332, 333, 334, 335, 336, 337, 338, 339, 340, 341, 342, 343, 344, 345, 346, 347, 348, 349, 350, 351, 352, 353, 354, 355, 356, 357, 358, 359, 360, 361, 362, 363, 364, 365, 366, 367, 368, 369, 370, 371, 372, 373, 374, 375, 376, 377, 378, 379, 380, 381, 382, 383, 384, 385, 386, 387, 388, 389, 390, 391, 392, 393, 394, 395, 396, 397, 398, 399, 400, 401, 402, 403, 404, 405, 406, 407, 408, 409, 410, 411, 412, 413, 414, 415, 416, 417, 418, 419, 420, 421, 422, 423, 424, 425, 426, 427, 428, 429, 430, 431, 432, 433, 434, 435, 436, 437, 438, 439, 440, 441, 442, 443, 444, 445, 446, 447, 448, 449, 450, 451, 452, 453, 454, 455, 456, 457, 458, 459, 460, 461, 462, 463, 464, 465, 466, 467, 468, 469, 470, 471, 472, 473, 474, 475, 476, 477, 478, 479, 480, 481, 482, 483, 484, 485, 486, 487, 488, 489, 490, 491, 492, 493, 494, 495, 496, 497, 498, 499, 500, 501, 502, 503, 504, 505, 506, 507, 508, 509, 510, 511, 512, 513, 514, 515, 516, 517, 518, 519, 520, 521, 522, 523, 524, 525, 526, 527, 528, 529, 530, 531, 532, 533, 534, 535, 536, 537, 538, 539, 540, 541, 542, 543, 544, 545, 546, 547, 548, 549, 550, 551, 552, 553, 554, 555, 556, 557, 558, 559, 560, 561, 562, 563, 564, 565, 566, 567, 568, 569, 570, 571, 572, 573, 574, 575, 576, 577, 578, 579, 580, 581, 582, 583, 584, 585, 586, 587, 588, 589, 590, 591, 592, 593, 594, 595, 596, 597, 598, 599, 600, 601, 602, 603, 604, 605, 606, 607, 608, 609, 610, 611, 612, 613, 614, 615, 616, 617, 618, 619, 620, 621, 622, 623, 624, 625, 626, 627, 628, 629, 630, 631, 632, 633, 634, 635, 636, 637, 638, 639, 640, 641, 642, 643, 644, 645, 646, 647, 648, 649, 650, 651, 652, 653, 654, 655, 656, 657, 658, 659, 660, 661, 662, 663, 664, 665, 666, 667, 668, 669, 670, 671, 672, 673, 674, 675, 676, 677, 678, 679, 680, 681, 682, 683, 684, 685, 686, 687, 688, 689, 690, 691, 692, 693, 694, 695, 696, 697, 698, 699, 700, 701, 702, 703, 704, 705, 706, 707, 708, 709, 710, 711, 712, 713, 714, 715, 716, 717, 718, 719, 720, 721, 722, 723, 724, 725, 726, 727, 728, 729, 730, 731, 732, 733, 734, 735, 736, 737, 738, 739, 740, 741, 742, 743, 744, 745, 746, 747, 748, 749, 750, 751, 752, 753, 754, 755, 756, 757, 758, 759, 760, 761, 762, 763, 764, 765, 766, 767, 768, 769, 770, 771, 772, 773, 774, 775, 776, 777, 778, 779, 780, 781, 782, 783, 784, 785, 786, 787, 788, 789, 790, 791, 792, 793, 794, 795, 796, 797, 798, 799, 800, 801, 802, 803, 804, 805, 806, 807, 808, 809, 810, 811, 812, 813, 814, 815, 816, 817, 818, 819, 820, 821, 822, 823, 824, 825, 826, 827, 828, 829, 830, 831, 832, 833, 834, 835, 836, 837, 838, 839, 840, 841, 842, 843, 844, 845, 846, 847, 848, 849, 850, 851, 852, 853, 854, 855, 856, 857, 858, 859, 860, 861, 862, 863, 864, 865, 866, 867, 868, 869, 870, 871, 872, 873, 874, 875, 876, 877, 878, 879, 880, 881, 882, 883, 884, 885, 886, 887, 888, 889, 890, 891, 892, 893, 894, 895, 896, 897, 898, 899, 900, 901, 902, 903, 904, 905, 906, 907, 908, 909, 910, 911, 912, 913, 914, 915, 916, 917, 918, 919, 920, 921, 922, 923, 924, 925, 926, 927, 928, 929, 930, 931, 932, 933, 934, 935, 936, 937, 938, 939, 940, 941, 942, 943, 944, 945, 946, 947, 948, 949, 950, 951, 952, 953, 954, 955, 956, 957, 958, 959, 960, 961, 962, 963, 964, 965, 966, 967, 968, 969, 970, 971, 972, 973, 974, 975, 976, 977, 978, 979, 980, 981, 982, 983, 984, 985, 986, 987, 988, 989, 990, 991, 992, 993, 994, 995, 996, 997, 998, 999, 1000)</sup> | 1 (14.29%) <sup>(52)</sup>                                |

|                                 |                                           |                                                                                                                                             |                                                                                                      |                              |
|---------------------------------|-------------------------------------------|---------------------------------------------------------------------------------------------------------------------------------------------|------------------------------------------------------------------------------------------------------|------------------------------|
|                                 |                                           | 62, 64, 66, 69, 71, 72, 81, 83, 85, 88, 93, 95, 101, 105, 108, 109)                                                                         | 69, 91, 107-109)                                                                                     |                              |
|                                 | Anonymity and/or confidentiality          | 22 (20.00%) <sup>(10, 12, 13, 35, 42, 44, 46, 49, 52, 55, 56, 68, 71, 87, 91, 95, 97, 106, 108)</sup>                                       | 16 (21.33%) <sup>(29, 39, 49, 52, 53, 55, 66, 69, 85, 87, 95, 107, 109)</sup>                        | 1 (14.29%) <sup>[18]</sup>   |
|                                 | Reporting format                          | 10 (9.09%) <sup>(29, 45, 69, 72, 85, 102, 105, 109)</sup>                                                                                   | 21 (28.00%) <sup>(4, 10, 11, 30, 37, 43, 49, 52, 55, 66, 69, 78, 85, 93, 95, 107, 109)</sup>         | 3 (42.86%) <sup>(13)</sup>   |
|                                 | Type of reporting system                  | 5 (4.55%) <sup>(24, 27, 106, 109)</sup>                                                                                                     | 11 (14.67%) <sup>(39, 44, 52, 62, 63, 85, 108, 109)</sup>                                            | -                            |
|                                 | Unknown destination of report             | 4 (3.64%) <sup>(10, 13, 44, 78)</sup>                                                                                                       | -                                                                                                    | -                            |
|                                 | Not enough information to complete report | 3 (2.73%) <sup>(10, 33, 98)</sup>                                                                                                           | 1 (1.33%) <sup>(42)</sup>                                                                            | -                            |
|                                 | Sharing/access of reports                 | 3 (2.73%) <sup>(43, 49, 81)</sup>                                                                                                           | -                                                                                                    | -                            |
|                                 | Insufficient routines for reporting       | 1 (0.91%) <sup>(88)</sup>                                                                                                                   | -                                                                                                    | -                            |
|                                 | Lack of reporting system                  | 1 (0.91%) <sup>(20)</sup>                                                                                                                   | -                                                                                                    | -                            |
|                                 | Administrative task                       | 1 (0.91%) <sup>(69)</sup>                                                                                                                   | -                                                                                                    | 1 (14.29%) <sup>(18)</sup>   |
|                                 | Relevant to different HCPs                | 1 (0.91%) <sup>(103)</sup>                                                                                                                  | 2 (2.67%) <sup>(43, 66)</sup>                                                                        | -                            |
|                                 | Reporting focus                           | 1 (0.91%) <sup>(71)</sup>                                                                                                                   | 2 (2.67%) <sup>(52)</sup>                                                                            | -                            |
|                                 | Information not readily available         | 1 (0.91%) <sup>(29)</sup>                                                                                                                   | -                                                                                                    | -                            |
|                                 | Not specified                             | -                                                                                                                                           | -                                                                                                    | 1 (14.29%) <sup>(18)</sup>   |
|                                 | When/where to report                      | -                                                                                                                                           | 1 (1.33%) <sup>(109)</sup>                                                                           | -                            |
|                                 | Doesn't require input from doctors        | -                                                                                                                                           | 1 (1.33%) <sup>(66)</sup>                                                                            | -                            |
|                                 | <b>Total</b>                              | <b>110 (100%)</b>                                                                                                                           | <b>75 (100%)</b>                                                                                     | <b>7 (100%)</b>              |
| <i>Incident Characteristics</i> | Level of harm                             | 40 (43.48%) <sup>(6, 12, 13, 21, 24, 28-30, 35, 46-49, 51, 54, 55, 64, 67, 69, 70, 73, 77-79, 81, 85, 86, 93-95, 97-99, 102, 106-108)</sup> | 26 (47.27%) <sup>(6, 23, 29, 30, 32, 39, 43, 45, 47, 48, 50, 51, 55, 74, 91, 94, 98, 102, 106)</sup> | -                            |
|                                 | Cause of incident                         | 19 (20.65%) <sup>(6, 7, 9, 10, 28, 40, 44-46, 48, 54, 69, 74, 98, 102)</sup>                                                                | 6 (10.91%) <sup>(6, 39, 42, 50, 91)</sup>                                                            | 2 (100%) <sup>(50, 54)</sup> |
|                                 | Frequency of incident                     | 18 (19.57%) <sup>(6, 7, 23, 28, 29, 42-44, 48, 54, 57, 68, 69, 78, 81, 98)</sup>                                                            | 13 (23.64%) <sup>(6, 23, 43, 55, 74, 91, 98)</sup>                                                   | -                            |
|                                 | Type of incident                          | 13 (14.13%) <sup>(9, 10, 23, 24, 35, 40, 62, 63, 67, 69, 72, 102, 109)</sup>                                                                | 8 (14.55%) <sup>(23, 45, 102)</sup>                                                                  | -                            |

|                                       |                                  |                                                                                                                                                  |                                                                                      |                                                              |
|---------------------------------------|----------------------------------|--------------------------------------------------------------------------------------------------------------------------------------------------|--------------------------------------------------------------------------------------|--------------------------------------------------------------|
|                                       | Level of risk                    | 2 (2.17%) <sup>(30, 55)</sup>                                                                                                                    | 1 (1.82%) <sup>(30)</sup>                                                            | -                                                            |
|                                       | Patient characteristics          | -                                                                                                                                                | 1 (1.82%) <sup>(45)</sup>                                                            | -                                                            |
|                                       | <b>Total</b>                     | <b>92 (100%)</b>                                                                                                                                 | <b>55 (100%)</b>                                                                     | <b>2 (100%)</b>                                              |
| <i>Individual HCP Characteristics</i> | Value/attitude towards reporting | 53 (59.55%) <sup>(1, 4, 6, 9, 10, 15, 17, 21, 23, 24, 28, 35, 42, 44, 46-49, 52, 64-66, 69, 72, 78, 83, 85, 87, 88, 93, 96, 103, 108, 109)</sup> | 21 (51.22%) <sup>(10, 18, 19, 30, 32, 39, 45, 47, 50, 52, 55, 60, 66, 72, 105)</sup> | 12 (27.91%) <sup>(16, 25, 54, 77, 83, 97, 99)</sup>          |
|                                       | Forgetfulness                    | 9 (10.11%) <sup>(7, 29, 35, 49, 54, 56, 72, 99, 109)</sup>                                                                                       | -                                                                                    | 1 (2.33%) <sup>(54)</sup>                                    |
|                                       | Perception of self               | 9 (10.11%) <sup>(10, 12-14, 20, 49, 68)</sup>                                                                                                    | 2 (4.88%) <sup>(101, 110)</sup>                                                      | 6 (13.95%) <sup>(13, 110)</sup>                              |
|                                       | Emotional response               | 6 (6.74%) <sup>(10, 12-14, 20, 49, 68)</sup>                                                                                                     | 5 (12.20%) <sup>(29, 30, 69)</sup>                                                   | -                                                            |
|                                       | Previous reporting behaviors     | 5 (5.62%) <sup>(3, 25, 40, 63, 87)</sup>                                                                                                         | 1 (2.44%) <sup>(53)</sup>                                                            | 1 (2.33%) <sup>(54)</sup>                                    |
|                                       | Exposure to errors               | 2 (2.25%) <sup>(18, 27)</sup>                                                                                                                    | 1 (2.44%) <sup>(105)</sup>                                                           | -                                                            |
|                                       | Length of time in employment     | 2 (2.25%) <sup>(25)</sup>                                                                                                                        | -                                                                                    | 1 (2.33%) <sup>(25)</sup>                                    |
|                                       | Seniority                        | 1 (1.12%) <sup>(25)</sup>                                                                                                                        | 3 (7.32%) <sup>(57, 91, 100)</sup>                                                   | 4 (9.30%) <sup>(25, 40, 50, 54)</sup>                        |
|                                       | Data required for own purposes   | 1 (1.12%) <sup>(44)</sup>                                                                                                                        | -                                                                                    | -                                                            |
|                                       | Work hours                       | 1 (1.12%) <sup>(40)</sup>                                                                                                                        | 1 (2.44%) <sup>(40)</sup>                                                            | 1 (2.33%) <sup>(38)</sup>                                    |
|                                       | Demographics                     | -                                                                                                                                                | 2 (4.88%) <sup>(19, 25)</sup>                                                        | 12 (27.91%) <sup>(16, 18, 25, 40, 50, 54, 81, 91, 100)</sup> |
|                                       | Profession                       | -                                                                                                                                                | 5 (12.20%) <sup>(82, 84)</sup>                                                       | 5 (11.63%) <sup>(82, 84, 110)</sup>                          |
|                                       | <b>Total</b>                     | <b>89 (100%)</b>                                                                                                                                 | <b>41 (100%)</b>                                                                     | <b>43 (100%)</b>                                             |
| <i>Knowledge and Skills</i>           | Clarify reporting mechanism      | 36 (42.86%) <sup>(7, 10, 12, 13, 23, 27-29, 40, 42, 44, 46-49, 55, 56, 64, 66, 68, 69, 78, 81, 83, 85, 93, 98, 108)</sup>                        | 2 (5.56%) <sup>(69, 85)</sup>                                                        | 5 (33.33%) <sup>(53, 54, 97, 99)</sup>                       |
|                                       | Adverse event/near miss clarity  | 31 (36.90%) <sup>(17, 23, 24, 29, 32, 45-47, 49, 55, 64, 66, 67, 69, 72, 79, 81, 85, 87, 93, 102, 109)</sup>                                     | 7 (19.44%) <sup>(11, 49, 66, 69, 78, 85, 93)</sup>                                   | 2 (13.33%) <sup>(97, 99)</sup>                               |
|                                       | Ability in error recognition     | 7 (8.33%) <sup>(17, 24, 43, 46, 74, 83, 95)</sup>                                                                                                | 4 (11.11%) <sup>(42, 43, 74, 91)</sup>                                               | 1 (6.67%) <sup>(97)</sup>                                    |
|                                       | Training                         | 5 (5.95%) <sup>(15, 18, 42, 45, 52)</sup>                                                                                                        | 21 (58.33%) <sup>(37, 42-44, 49, 62, 66, 68, 78, 95, 108, 109)</sup>                 | 7 (46.67%) <sup>(15, 37, 54, 91)</sup>                       |

|                         |                                                     |                                                                                                                                               |                                                                                                     |                                    |
|-------------------------|-----------------------------------------------------|-----------------------------------------------------------------------------------------------------------------------------------------------|-----------------------------------------------------------------------------------------------------|------------------------------------|
|                         | Awareness                                           | 4 (4.76%) <sup>(46, 79, 95, 98)</sup>                                                                                                         | 2 (5.56%) <sup>(43, 102)</sup>                                                                      | -                                  |
|                         | Not enough information about product being reported | 1 (1.19%) <sup>(101)</sup>                                                                                                                    | -                                                                                                   | -                                  |
|                         | <b>Total</b>                                        | <b>84 (100%)</b>                                                                                                                              | <b>36 (100%)</b>                                                                                    | <b>15 (100%)</b>                   |
| <i>Work Environment</i> | Workload/priority                                   | 50 (62.50%) <sup>(1, 4, 7, 12-14, 22, 24, 28-30, 42, 43, 45-48, 50, 52, 54-56, 63, 65-69, 72, 78, 79, 81, 91, 92, 97, 99-101, 105, 109)</sup> | 6 (33.33%) <sup>(29, 42, 43, 80, 91)</sup>                                                          | 3 (30.00%) <sup>(8, 50, 81)</sup>  |
|                         | Accessibility                                       | 27 (33.75%) <sup>(7, 10, 12, 13, 15, 23, 29, 40, 43-46, 56, 63-65, 68, 72, 81, 87, 95, 98, 109)</sup>                                         | 11 (61.11%) <sup>(11, 43, 44, 49, 52, 69, 87, 108, 109)</sup>                                       | 1 (10.00%) <sup>(97)</sup>         |
|                         | Not specified                                       | 2 (2.50%) <sup>(4, 64)</sup>                                                                                                                  | -                                                                                                   | -                                  |
|                         | Unit type                                           | 1 (1.25%) <sup>(100)</sup>                                                                                                                    | 1 (5.56%) <sup>(100)</sup>                                                                          | 3 (30.00%) <sup>(75, 100)</sup>    |
|                         | Physical working conditions                         | -                                                                                                                                             | -                                                                                                   | 1 (10.00%) <sup>(38)</sup>         |
|                         | Satisfaction with work environment                  | -                                                                                                                                             | -                                                                                                   | 1 (10.00%) <sup>(58)</sup>         |
|                         | Care pathways                                       | -                                                                                                                                             | -                                                                                                   | 1 (10.00%) <sup>(100)</sup>        |
|                         | <b>Total</b>                                        | <b>80 (100%)</b>                                                                                                                              | <b>18 (100%)</b>                                                                                    | <b>10 (100%)</b>                   |
| <i>Organization</i>     | Feedback/communication                              | 26 (34.21%) <sup>(4, 5, 8, 15, 17, 24-26, 30, 35, 46, 49, 55, 65-67, 69, 71, 79, 85, 90, 95, 102, 105, 109)</sup>                             | 29 (29.90%) <sup>(4, 10, 11, 42-44, 49, 52, 55, 61, 62, 66, 69, 75, 78, 85, 91, 93, 107, 109)</sup> | 2 (9.09%) <sup>(37, 50)</sup>      |
|                         | Reporting culture                                   | 17 (22.37%) <sup>(6, 8, 9, 15, 24, 46, 63, 66, 78, 88, 98, 100, 104, 105, 109)</sup>                                                          | 16 (16.49%) <sup>(6, 16, 23, 31, 43, 53, 59, 60, 62, 69, 75, 80, 95)</sup>                          | 1 (4.54%) <sup>(16)</sup>          |
|                         | Learning/improvement                                | 7 (9.21%) <sup>[20, 59, 76, 90, 94, 102, 103]</sup>                                                                                           | 13 (13.40%) <sup>(4, 29, 39, 52, 59, 66, 69, 78, 102, 105)</sup>                                    | 2 (9.09%) <sup>(8, 53)</sup>       |
|                         | Use of data                                         | 7 (9.21%) <sup>(4, 17, 24, 79, 90)</sup>                                                                                                      | 2 (2.06%) <sup>(107, 109)</sup>                                                                     | -                                  |
|                         | Policy                                              | 6 (7.89%) <sup>(2, 43, 48, 52, 55, 71)</sup>                                                                                                  | 22 (22.68%) <sup>(9-11, 30, 36, 39, 42-44, 49, 52, 53, 55, 62, 66, 91, 93, 95)</sup>                | 2 (9.09%) <sup>(37, 50)</sup>      |
|                         | Management response                                 | 5 (6.58%) <sup>(14, 24, 52, 75, 83)</sup>                                                                                                     | 2 (2.06%) <sup>(30, 76)</sup>                                                                       | 4 (18.18%) <sup>(18, 53, 76)</sup> |
|                         | Outcomes of analysis                                | 4 (5.26%) <sup>(47, 104, 109)</sup>                                                                                                           | 1 (1.03%) <sup>(69)</sup>                                                                           | -                                  |
|                         | Resource                                            | 2 (2.63%) <sup>(14, 52)</sup>                                                                                                                 | 3 (3.09%) <sup>(37, 43, 68)</sup>                                                                   | 1 (4.54%) <sup>(37)</sup>          |
|                         | Ownership                                           | 1 (1.32%) <sup>(39)</sup>                                                                                                                     | 4 (4.12%) <sup>(37, 40, 50)</sup>                                                                   | 6 (27.27%) <sup>(37, 91)</sup>     |

|                            |                                 |                                                                                |                                                 |                            |
|----------------------------|---------------------------------|--------------------------------------------------------------------------------|-------------------------------------------------|----------------------------|
|                            | Hierarchy                       | 1 (1.32%) <sup>(20)</sup>                                                      | -                                               | -                          |
|                            | Size                            | -                                                                              | 3 (3.09%) <sup>(37, 38, 100)</sup>              | 1 (4.54%) <sup>(38)</sup>  |
|                            | Nursing quality                 | -                                                                              | 1 (1.03%) <sup>(18)</sup>                       | -                          |
|                            | Awareness                       | -                                                                              | 1 (1.03%) <sup>(69)</sup>                       | -                          |
|                            | Location                        | -                                                                              | -                                               | 1 (4.54%) <sup>(38)</sup>  |
|                            | Elapsed time of IRS integration | -                                                                              | -                                               | 1 (4.54%) <sup>(37)</sup>  |
|                            | Ward rounds                     | -                                                                              | -                                               | 1 (4.54%) <sup>(37)</sup>  |
|                            | <b>Total</b>                    | <b>76 (100%)</b>                                                               | <b>97 (100%)</b>                                | <b>22 (100%)</b>           |
| <i>Team Factors</i>        | Relationships                   | 13 (39.39%) <sup>(6, 14, 30, 36, 47, 49, 55, 56, 69, 87, 105)</sup>            | 2 (10.00%) <sup>(45, 100)</sup>                 | -                          |
|                            | Influence of Seniors            | 7 (21.21%) <sup>(25, 45, 51, 59, 87, 95)</sup>                                 | 1 (5.00%) <sup>(49)</sup>                       | -                          |
|                            | Peer reporting                  | 5 (15.15%) <sup>(28, 83, 102)</sup>                                            | 3 (15.00%) <sup>(18, 19, 44)</sup>              | -                          |
|                            | Teamwork/communication          | 3 (9.09%) <sup>(20, 43, 55)</sup>                                              | 7 (35.00%) <sup>(31, 43, 80, 91)</sup>          | 2 (66.67%) <sup>(8)</sup>  |
|                            | Support/encouragement           | 3 (9.09%) <sup>(35, 49, 69)</sup>                                              | 1 (5.00%) <sup>(49)</sup>                       | 1 (33.33%) <sup>(99)</sup> |
|                            | Medical doctor involvement      | 1 (3.03%) <sup>(85)</sup>                                                      | 1 (5.00%) <sup>(85)</sup>                       | -                          |
|                            | Error committed by junior staff | 1 (3.03%) <sup>(30)</sup>                                                      | 1 (5.00%) <sup>(51)</sup>                       | -                          |
|                            | Team culture                    | -                                                                              | 4 (20.00%) <sup>(10, 19, 60, 80)</sup>          | -                          |
|                            | <b>Total</b>                    | <b>33 (100%)</b>                                                               | <b>20 (100%)</b>                                | <b>3 (100%)</b>            |
| <i>Professional Ethics</i> | Concealment                     | 5 (21.74%) <sup>(1, 49, 102)</sup>                                             | 1 (5.88%) <sup>(55)</sup>                       | -                          |
|                            | Duty                            | 1 (4.35%) <sup>(9)</sup>                                                       | 8 (47.06%) <sup>(10, 32, 43, 44, 47, 102)</sup> | 1 (25.00%) <sup>(50)</sup> |
|                            | Accountability                  | -                                                                              | 2 (11.76%) <sup>(23, 47)</sup>                  | -                          |
|                            | Responsibility                  | 15 (65.22%) <sup>(2, 23, 33, 35, 40, 46, 48, 63, 66, 69, 72, 78, 85, 88)</sup> | 5 (29.41%) <sup>(33, 34, 91, 105)</sup>         | 1 (25.00%) <sup>(38)</sup> |
|                            | Culture                         | 2 (8.70%) <sup>(49, 87)</sup>                                                  | -                                               | -                          |
|                            | Legal                           | -                                                                              | 1 (5.88%) <sup>(25)</sup>                       | 2 (50.00%) <sup>(25)</sup> |
|                            | <b>Total</b>                    | <b>23 (100%)</b>                                                               | <b>17 (100%)</b>                                | <b>4 (100%)</b>            |



## References

1. Albolino S, Tartaglia R, Bellandi T, Amicosante AM, Bianchini E, Biggeri A. Patient safety and incident reporting: survey of Italian healthcare workers. *Quality & safety in health care*. 2010;19 Suppl 3:i8-12.
2. Alsafi E, Bahroon SA, Tamim H, Al-Jahdali HH, Alzahrani S, Al Sayyari A. Physicians' attitudes toward reporting medical errors-an observational study at a general hospital in Saudi Arabia. *Journal of patient safety*. 2011;7(3):144-7.
3. Anderson JE, Kodate N, Walters R, Dodds A. Can incident reporting improve safety? Healthcare practitioners' views of the effectiveness of incident reporting. *International Journal for Quality in Health Care*. 2013;25(2):141-50.
4. Arfanis K, Smith A. Informal risk assessment strategies in health care staff: An unrecognized source of resilience? *Journal of Evaluation in Clinical Practice*. 2012;18(6):1140-6.
5. Armitage G, Newell R, Wright J. Improving the quality of drug error reporting. *Journal of Evaluation in Clinical Practice*. 2010;16(6):1189-97.
6. Ashcroft DM, Morecroft C, Parker D, Noyce PR. Likelihood of reporting adverse events in community pharmacy: An experimental study. *Quality and Safety in Health Care*. 2006;15(1):48-52.
7. Bäckström M, Mjörndal T, Dahlqvist R, Nordkvist-Olsson T. Attitudes to reporting adverse drug reactions in northern Sweden. *European Journal of Clinical Pharmacology*. 2000;56(9-10):729-32.
8. Ballangrud R, Hedelin B, Hall-Lord ML. Nurses' perceptions of patient safety climate in intensive care units: A cross-sectional study. *Intensive and Critical Care Nursing*. 2012;28(6):344-54.
9. Bateman DN, Sanders GL, Rawlins MD. Attitudes to adverse drug reaction reporting in the Northern Region. *British Journal of Clinical Pharmacology*. 1992;34(5):421-6.
10. Bawazir SA. ATTITUDE OF COMMUNITY PHARMACISTS IN SAUDI ARABIA TOWARDS ADVERSE DRUG REACTION REPORTING. *Saudi Pharmaceutical Journal*. 2006;14(1):75-83.
11. Beasley JW, Escoto KH, Karsh BT. Design Elements for a Primary Care Medical Reporting System. *Wisconsin Medical Journal*. 2004;103(1):56-9.
12. Belton KJ, Lewis SC, Payne S, Rawlins MD, Wood SM. Attitudinal survey of adverse drug reaction reporting by medical practitioners in the United Kingdom [see comments]. *British Journal of Clinical Pharmacology*. 1995;39(3):223-6.
13. Belton KJ. Attitude survey of adverse drug-reaction reporting by health care professionals across the European Union. *European Journal of Clinical Pharmacology*. 1997;52(6):423-7.
14. Blegen MA, Vaughn T, Pepper G, Vojir C, Stratton K, Boyd M, et al. Patient and Staff Safety: Voluntary Reporting. *American Journal of Medical Quality*. 2004;19(2):67-74.
15. Braithwaite J, Westbrook MT, Travaglia JF, Hughes C. Cultural and associated enablers of, and barriers to, adverse incident reporting. *Quality & safety in health care*. 2010;19(3):229-33.

16. Chang IC, Hsu HM. Predicting medical staff intention to use an online reporting system with modified unified theory of acceptance and use of technology. *Telemedicine journal and e-health : the official journal of the American Telemedicine Association*. 2012;18(1):67-73.
17. Chiang HY, Pepper GA. Barriers to nurses' reporting of medication administration errors in Taiwan. *J Nurs Scholarsh*. 2006;38(4):392-9.
18. Chiang HY, Lin SY, Hsu SC, Ma SC. Factors determining hospital nurses' failures in reporting medication errors in Taiwan. *Nursing Outlook*. 2010;58(1):17-25.
19. Chiang HY, Lin SY, Hsiao YC, Chang Y. Culture influence and predictors for behavioral involvement in patient safety among hospital nurses in Taiwan. *Journal of Nursing Care Quality*. 2012;27(4):359-67.
20. Church JA, Adams RD, Hendrix LH, Holmes JA, Marks LB, Chen RC. National study to determine the comfort levels of radiation therapists and medical dosimetrists to report errors. *Practical Radiation Oncology*. 2013;3(4):e165-e70.
21. Clark M, Gray M, Mooney J. New graduate occupational therapists' perceptions of near-misses and mistakes in the workplace. *International Journal of Health Care Quality Assurance*. 2013;26(6):564-76.
22. Coley KC, Pringle JL, Weber RJ, Rice K, Ramanujam R, Sirio CA. Perceived Barriers in Using a Region-Wide Medication Error Reporting System. *Journal of Patient Safety*. 2006;2(1):39-44.
23. Cosentino M, Leoni O, Banfi F, Lecchini S, Frigo G. ATTITUDES TO ADVERSE DRUG REACTION REPORTING BY MEDICAL PRACTITIONERS IN A NORTHERN ITALIAN DISTRICT. *Pharmacological Research*. 1997;35(2):85-8.
24. Covell CL, Ritchie JA. Nurses responses to medication errors: Suggestions for the development of organizational strategies to improve reporting. *Journal of Nursing Care Quality*. 2009;24(4):287-97.
25. Daly JM, Jogerst GJ. Association of knowledge of adult protective services legislation with rates of reporting of abuse in Iowa nursing homes. *J Am Med Dir Assoc*. 2005;6(2):113-20.
26. Davies EC, Chandler CIR, Innocent SHS, Kalumuna C, Terlouw DJ, Lalloo DG, et al. Designing adverse event forms for real-world reporting: Participatory research in uganda. *PLoS ONE*. 2012;7(3).
27. Ehrenpreis ED, Sifuentes H, Ehrenpreis JE, Smith ZL, Marshall ML. Suboptimal reporting of adverse medical events to the FDA Adverse Events Reporting System by nurse practitioners and physician assistants. *Expert Opinion on Drug Safety*. 2012;11(2):177-83.
28. Eland, Belton, Van G, Meiners, Rawlins, Stricker. Attitudinal survey of voluntary reporting of adverse drug reactions. *British Journal of Clinical Pharmacology*. 1999;48(4):623-7.
29. Elder NC, Graham D, Brandt E, Hickner J. Barriers and motivators for making error reports from family medicine offices: A report from the American Academy of Family Physicians National Research Network (AAFP NRN) (Journal of the American Board of Family Medicine (2007) 20, 2, (115-123) DOI: 10.3122/jabfm.2007.04.070111). *Journal of the American Board of Family Medicine*. 2007;20(4):425.

30. Elder NCB, S.M.; Nagy, M.; Kudel, I.; Render, M.L. Nurses' perceptions of error communication and reporting in the intensive care unit. *J Patient Saf.* 2008;4:162-8.
31. Erler C, Edwards NE, Ritchey S, Pesut DJ, Sands L, Wu J. Perceived Patient Safety Culture in a Critical Care Transport Program. *Air Medical Journal.* 2013;32(4):208-15.
32. Espin S, Wickson-Griffiths A, Wilson M, Lingard L. To report or not to report: A descriptive study exploring ICU nurses' perceptions of error and error reporting. *Intensive and Critical Care Nursing.* 2010;26(1):1-9.
33. Espin S, Regehr G, Levinson W, Baker GR, Biancucci C, Lingard L. Factors Influencing Perioperative Nurses' Error Reporting Preferences. *AORN Journal.* 2007;85(3):527–8, 30–32, 34–36, 39–43.
34. Espin S, Levinson W, Regehr G, Baker GR, Lingard L. Error or "act of God"? A study of patients' and operating room team members' perceptions of error definition, reporting, and disclosure. *Surgery.* 2006;139(1):6-14.
35. Evans SM, Berry JG, Smith BJ, Esterman A, Selim P, O'Shaughnessy J, et al. Attitudes and barriers to incident reporting: A collaborative hospital study. *Quality and Safety in Health Care.* 2006;15(1):39-43.
36. Fairbanks RJ, Crittenden CN, O'Gara KG, Wilson MA, Pennington EC, Chin NP, et al. Emergency medical services provider perceptions of the nature of adverse events and near-misses in out-of-hospital care: An ethnographic view. *Academic Emergency Medicine.* 2008;15(7):633-40.
37. Fukuda H, Imanaka Y, Hirose M, Hayashida K. Impact of system-level activities and reporting design on the number of incident reports for patient safety. *Quality & safety in health care.* 2010;19(2):122-7.
38. Gaal S, van den Hombergh P, Verstappen W, Wensing M. Patient safety features are more present in larger primary care practices. *Health Policy.* 2010;97(1):87-91.
39. Garbutt J, Brownstein DR, Klein EJ, Waterman A, Krauss MJ, Marcuse EK, et al. Reporting and disclosing medical errors: Pediatricians' attitudes and behaviors. *Archives of Pediatrics and Adolescent Medicine.* 2007;161(2):179-85.
40. Generali JA, Danish MA, Rosenbaum SE. Knowledge of and attitudes about adverse drug reaction reporting among Rhode Island pharmacists. *The Annals of pharmacotherapy.* 1995;29(4):365-9.
41. Gladstone J. Drug administration errors: a study into the factors underlying the occurrence and reporting of drug errors in a district general hospital. *Journal of advanced nursing.* 1995;22(4):628-37.
42. Green CF, Mottram DR, Raval D, Proudlove C, Randall C. Community pharmacists' attitudes to adverse drug reaction reporting. *International Journal of Pharmacy Practice.* 1999;7(2):92-9.
43. Green CF, Mottram DR, Rowe PH, Pirmohamed M. Attitudes and knowledge of hospital pharmacists to adverse drug reaction reporting. *British Journal of Clinical Pharmacology.* 2001;51(1):81-6.

44. Van Grootheest AC, Mes K, De Jong-Van Den Berg LTW. Attitudes of community pharmacists in the Netherlands towards adverse drug reaction reporting. *International Journal of Pharmacy Practice*. 2002;10(4):267-72.
45. Haines TP, Cornwell P, Fleming J, Varghese P, Gray L. Documentation of in-hospital falls on incident reports: qualitative investigation of an imperfect process. *BMC health services research*. 2008;8:254.
46. Handler SM, Perera S, Olshansky EF, Studenski SA, Nace DA, Fridsma DB, et al. Identifying Modifiable Barriers to Medication Error Reporting in the Nursing Home Setting. *Journal of the American Medical Directors Association*. 2007;8(9):568-74.
47. Hartnell N, MacKinnon N, Sketris I, Fleming M. Identifying, understanding and overcoming barriers to medication error reporting in hospitals: A focus group study. *BMJ Quality and Safety*. 2012;21(5):361-8.
48. Hasford J, Goettler M, Munter KH, Müller-Oerlinghausen B. Physicians' knowledge and attitudes regarding the spontaneous reporting system for adverse drug reactions. *Journal of Clinical Epidemiology*. 2002;55(9):945-50.
49. Heard GC, Sanderson PM, Thomas RD. Barriers to adverse event and error reporting in anesthesia. *Anesthesia and Analgesia*. 2012;114(3):604-14.
50. Herdeiro M, Figueiras A, Polónia J, Gestal-Otero JJ. Influence of Pharmacists' Attitudes on Adverse Drug Reaction Reporting. *Drug Safety*. 2006;29(4):331-40.
51. Hohenhaus SM. Emergency Nursing and Medical Error-A Survey of Two States. *Journal of Emergency Nursing*. 2008;34(1):20-5.
52. Holmstrom AR, Airaksinen M, Weiss M, Wuliji T, Chan XH, Laaksonen R. National and local medication error reporting systems: a survey of practices in 16 countries. *Journal of patient safety*. 2012;8(4):165-76.
53. Hutchinson A, Young TA, Cooper KL, McIntosh A, Karnon JD, Scobie S, et al. Trends in healthcare incident reporting and relationship to safety and quality data in acute hospitals: Results from the National Reporting and Learning System. *Quality and Safety in Health Care*. 2009;18(1):5-10.
54. Irujo M, Beitia G, Bes-Rastrollo M, Figueiras A, Hernández-Díaz S, Lasheras B. Factors that Influence Under-Reporting of Suspected Adverse Drug Reactions among Community Pharmacists in a Spanish Region. *Drug Safety*. 2007;30(11):1073-82.
55. Jeffe DB, Dunagan WC, Garbutt J, Burroughs TE, Gallagher TH, Hill PR, et al. Using focus groups to understand physicians' and nurses' perspectives on error reporting in hospitals. *Joint Commission journal on quality and safety*. 2004;30(9):471-9.
56. Jennings PA, Stella J. Barriers to incident notification in a regional prehospital setting. *Emergency Medicine Journal*. 2011;28(6):526-9.
57. Johnstone MJ, Kanitsaki O. Patient safety and the integration of graduate nurses into effective organizational clinical risk management systems and processes: an Australian study. *Quality management in health care*. 2008;17(2):162-73.

58. Joolae S, Hajibabae F, Peyrovi H, Haghani H, Bahrani N. The relationship between incidence and report of medication errors and working conditions. *International Nursing Review*. 2011;58(1):37-44.
59. Kagan I, Barnoy S. Factors associated with reporting of medication errors by Israeli nurses. *Journal of Nursing Care Quality*. 2008;23(4):353-61.
60. Kagan I, Barnoy S. Organizational safety culture and medical error reporting by Israeli nurses. *Journal of Nursing Scholarship*. 2013;45(3):273-80.
61. Kaldjian LC, Jones EW, Wu BJ, Forman-Hoffman VL, Levi BH, Rosenthal GE. Reporting medical errors to improve patient safety: A survey of physicians in teaching hospitals. *Archives of Internal Medicine*. 2008;168(1):40-6.
62. Karsh BT, Escoto KH, Beasley JW, Holden RJ. Toward a theoretical approach to medical error reporting system research and design. *Applied Ergonomics*. 2006;37(3):283-95.
63. Kennedy AG, Littenberg B. Medication error reporting by community pharmacists in Vermont. *Journal of the American Pharmacists Association : JAPhA*. 2004;44(4):434-8.
64. Khan TM. Community pharmacists' knowledge and perceptions about adverse drug reactions and barriers towards their reporting in eastern region, alahsa, Saudi Arabia. *Therapeutic Advances in Drug Safety*. 2013;4(2):45-51.
65. King ES, Moyer DV, Couturie MJ, Gaughan JP, Shulkin DJ. Getting doctors to report medical errors: project DISCLOSE. *Jt Comm J Qual Patient Saf*. 2006;32(7):382-92.
66. Kingston MJ, Evans SM, Smith BJ, Berry JG. Attitudes of doctors and nurses towards incident reporting: A qualitative analysis. *Medical Journal of Australia*. 2004;181(1):36-9.
67. Kreckler S, Catchpole K, McCulloch P, Handa A. Factors influencing incident reporting in surgical care. *Quality and Safety in Health Care*. 2009;18(2):116-20.
68. Li Q, Zhang S-m, Chen H-t, Fang S-p, Yu X, Liu D, et al. Awareness and attitudes of healthcare professionals in Wuhan, China to the reporting of adverse drug reactions. *Chinese medical journal*. 2004;117(6):856-61.
69. Martowirono K, Jansma JD, Van Luijk SJ, Wagner C, Bijnen AB. Possible solutions for barriers in incident reporting by residents. *Journal of Evaluation in Clinical Practice*. 2012;18(1):76-81.
70. Mayo AM, Duncan D. Nurse Perceptions of Medication Errors: What We Need to Know for Patient Safety. *Journal of Nursing Care Quality*. 2004;19(3):209-17.
71. McArdle D, Burns N, Ireland A. Attitudes and beliefs of doctors towards medication error reporting. *International Journal of Health Care Quality Assurance*. 2003;16(7):326-33.
72. Merchant RN, Gully PM. A survey of British Columbia anesthesiologists on a provincial critical incident reporting program. *Canadian Journal of Anesthesia*. 2005;52(7):680-4.
73. Mrayyan MT, Shishani K, Al-Faouri I. Rate, causes and reporting of medication errors in Jordan: nurses' perspectives. *Journal of Nursing Management*. 2007;15(6):659-70.
74. Mustafa G, Saeed ur R, Aziz MT. Adverse drug reaction reporting system at different hospitals of Lahore, Pakistan - An evaluation and patient outcome analysis. *Journal of Applied Pharmacy*. 2013;5(1):713-9.

75. Naveh E, Katz-Navon T, Stern Z. Readiness to report medical treatment errors: the effects of safety procedures, safety information, and priority of safety. *Medical care*. 2006;44(2):117-23.
76. Okuyama A, Sasaki M, Kanda K. The relationship between incident reporting by nurses and safety management in hospitals. *Quality management in health care*. 2010;19(2):164-72.
77. Osborne J, Blais K, Hayes JS. Nurses' Perceptions: When Is It a Medication Error? *Journal of Nursing Administration*. 1999;29(4):33-8.
78. Parvizi N, Robertson I, McWilliams RG. Medical device adverse incident reporting in interventional radiology. *Clinical Radiology*. 2014;69(3):263-7.
79. Patrician PA, Brosch LR. Medication error reporting and the work environment in a military setting. *Journal of Nursing Care Quality*. 2009;24(4):277-86.
80. Rasmussen K, Pedersen AHM, Pape L, Lyngby Mikkelsen K, Madsen MD, Jacob Nielsen K. Work environment influences adverse events in an emergency department. *Danish Medical Journal*. 2014;61(5).
81. Rogers A, Israel E, Smith CR, et al. Physician knowledge, attitudes, and behavior related to reporting adverse drug events. *Archives of Internal Medicine*. 1988;148(7):1596-600.
82. Rowin EJ, Lucier D, Pauker SG, Kumar S, Chen J, Salem DN. Does error and adverse event reporting by physicians and nurses differ? *Joint Commission journal on quality and patient safety / Joint Commission Resources*. 2008;34(9):537-45.
83. Sanghera IS, Franklin BD, Dhillon S. The attitudes and beliefs of healthcare professionals on the causes and reporting of medication errors in a UK Intensive care unit. *Anaesthesia*. 2007;62(1):53-61.
84. Sarvadikar A, Prescott G, Williams D. Attitudes to reporting medication error among differing healthcare professionals. *European Journal of Clinical Pharmacology*. 2010;66(8):843-53.
85. Schectman JM, Plews-Ogan ML. Physician perception of hospital safety and barriers to incident reporting. *Joint Commission journal on quality and patient safety / Joint Commission Resources*. 2006;32(6):337-43.
86. Schulmeister L. Chemotherapy medication errors: descriptions, severity, and contributing factors. *Oncology nursing forum*. 1999;26(6):1033-42.
87. Sharma A, Jain P, Parmar B, Muzaffar J, Monson JRT. Incident Reporting in Surgical Trainees-Revisited. *Journal of Patient Safety*. 2008;4(3):191-4.
88. Soderberg J, Grankvist K, Brulin C, Wallin O. Incident reporting practices in the preanalytical phase: Low reported frequencies in the primary health care setting. *Scandinavian Journal of Clinical & Laboratory Investigation*. 2009;69(7):731-5.
89. Soleimani F. Learning from mistakes in New Zealand hospitals: what else do we need besides "no-fault"? *New Zealand Medical Journal*. 2006;119(1239):U2099.
90. Stratton KM, Blegen MA, Pepper G, Vaughn T. Reporting of Medication Errors by Pediatric Nurses. *Journal of Pediatric Nursing*. 2004;19(6):385-92.
91. Sweis D, Wong IK. A Survey on Factors that Could Affect Adverse Drug Reaction Reporting According to Hospital Pharmacists in Great Britain. *Drug Safety*. 2000;23(2):165-72.

92. Tariq A, Georgiou A, Westbrook J. Medication incident reporting in residential aged care facilities: limitations and risks to residents' safety. *BMC geriatrics*. 2012;12:67.
93. Taylor JA, Brownstein D, Christakis DA, Blackburn S, Strandjord TP, Klein EJ, et al. Use of incident reports by physicians and nurses to document medical errors in pediatric patients. *Pediatrics*. 2004;114(3):729-35.
94. Throckmorton T, Etchegaray J. Factors Affecting Incident Reporting by Registered Nurses: The Relationship of Perceptions of the Environment for Reporting Errors, Knowledge of the Nursing Practice Act, and Demographics on Intent to Report Errors. *Journal of Perianesthesia Nursing*. 2007;22(6):400-12.
95. Tobaiqy M, Stewart D. Exploring health professionals' experiences of medication errors in Saudi Arabia. *International Journal of Clinical Pharmacy*. 2013;35(4):542-5.
96. Turner S, Ramsay A, Fulop N. The role of professional communities in governing patient safety. *Journal of Health, Organisation and Management*. 2013;27(4):527-43.
97. Uribe CL, Schweikhart SB, Pathak DS, Marsh GB, Fraley RR. Perceived barriers to medical-error reporting: An exploratory investigation. *Journal of Healthcare Management*. 2002;47(4):263-80.
98. Vessal G, Mardani Z, Mollai M. Knowledge, attitudes, and perceptions of pharmacists to adverse drug reaction reporting in Iran. *Pharmacy World and Science*. 2009;31(2):183-7.
99. Vincent C, Stanhope N, Crowley-Murphy M. Reasons for not reporting adverse incidents: An empirical study. *Journal of Evaluation in Clinical Practice*. 1999;5(1):13-21.
100. Vogus TJ, Sutcliffe KM. The impact of safety organizing, trusted leadership, and care pathways on reported medication errors in hospital nursing units. *Medical Care*. 2007;45(10):997-1002.
101. Walji R, Boon H, Barnes J, Welsh S, Austin Z, Baker GR. Reporting natural health product related adverse drug reactions: Is it the pharmacist's responsibility? *International Journal of Pharmacy Practice*. 2011;19(6):383-91.
102. Walker SB, Lowe MJ. Nurses' views on reporting medication incidents. *International journal of nursing practice*. 1998;4(2):97-102.
103. Waring JJ. A qualitative study of the intra-hospital variations in incident reporting. *International Journal for Quality in Health Care*. 2004;16(5):347-52.
104. Waring JJ. Beyond blame: Cultural barriers to medical incident reporting. *Social Science and Medicine*. 2005;60(9):1927-35.
105. Waters NF, Hall WA, Brown H, Espezel H, Palmer L. Perceptions of Canadian labour and delivery nurses about incident reporting: A qualitative descriptive focus group study. *International Journal of Nursing Studies*. 2012;49(7):811-21.
106. Weissman JS, Annas CL, Epstein AM, Schneider EC, Clarridge B, Kirle L, et al. Error reporting and disclosure systems: views from hospital leaders. *JAMA : the journal of the American Medical Association*. 2005;293(11):1359-66.

107. Williams SD, Phipps DL, Ashcroft DM. Understanding the attitudes of hospital pharmacists to reporting medication incidents: A qualitative study. *Research in Social and Administrative Pharmacy*. 2013;9(1):80-9.
108. Winchester SA, Tomkins S, Cliffe S, Batty L, Ncube F, Zuckerman M. Healthcare workers' perceptions of occupational exposure to blood-borne viruses and reporting barriers: a questionnaire-based study. *J Hosp Infect*. 2012;82(1):36-9.
109. Yong H, Kluger MT. Incident reporting in anaesthesia: A survey of practice in New Zealand. *Anaesthesia and Intensive Care*. 2003;31(5):555-9.
110. Zwart DLM, Heddema WS, Vermeulen MI, Van Rensen ELJ, Verheij TJM, Kalkman CJ. Lessons learnt from incidents reported by postgraduate trainees in Dutch general practice. A prospective cohort study. *BMJ Quality and Safety*. 2011;20(10):857-62.
